# Supplementary material for: Climatic niche comparison across a cryptic species complex
Source: PeerJ journal article supplement (doi:10.7717/peerj.7042), 2019-05-31

**Figure S7. Result of identify test by ENMtools**

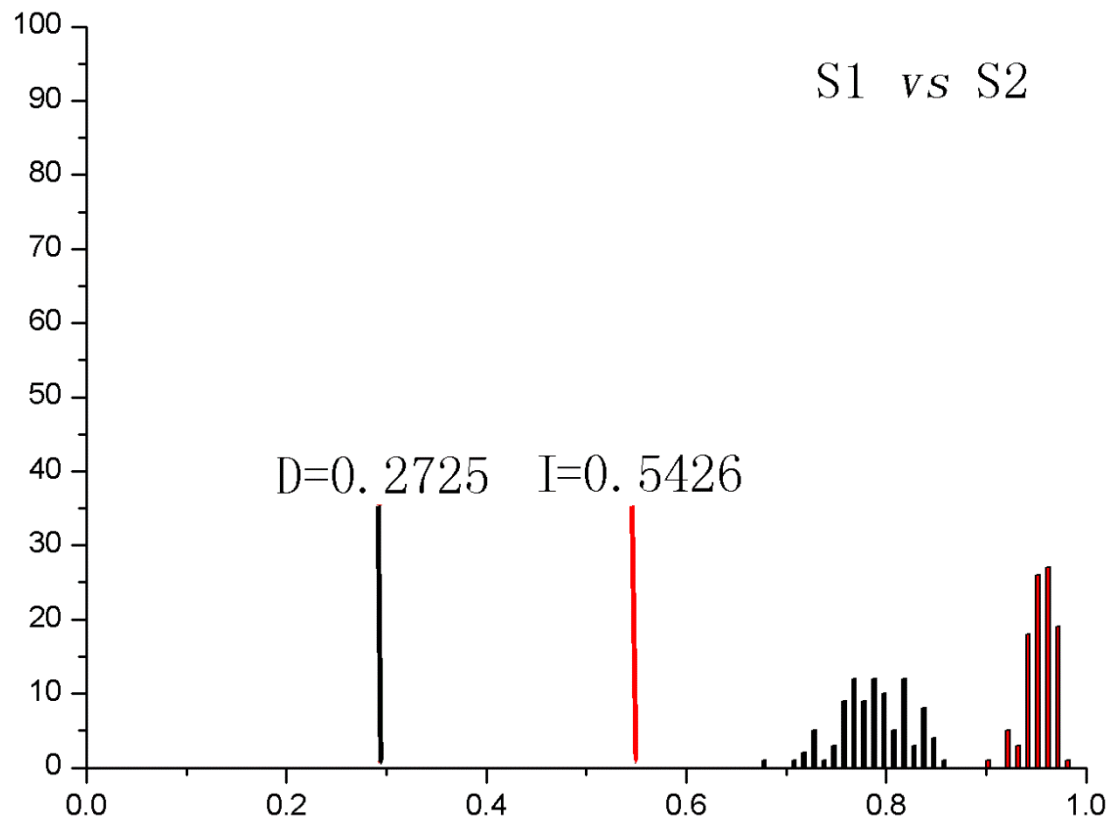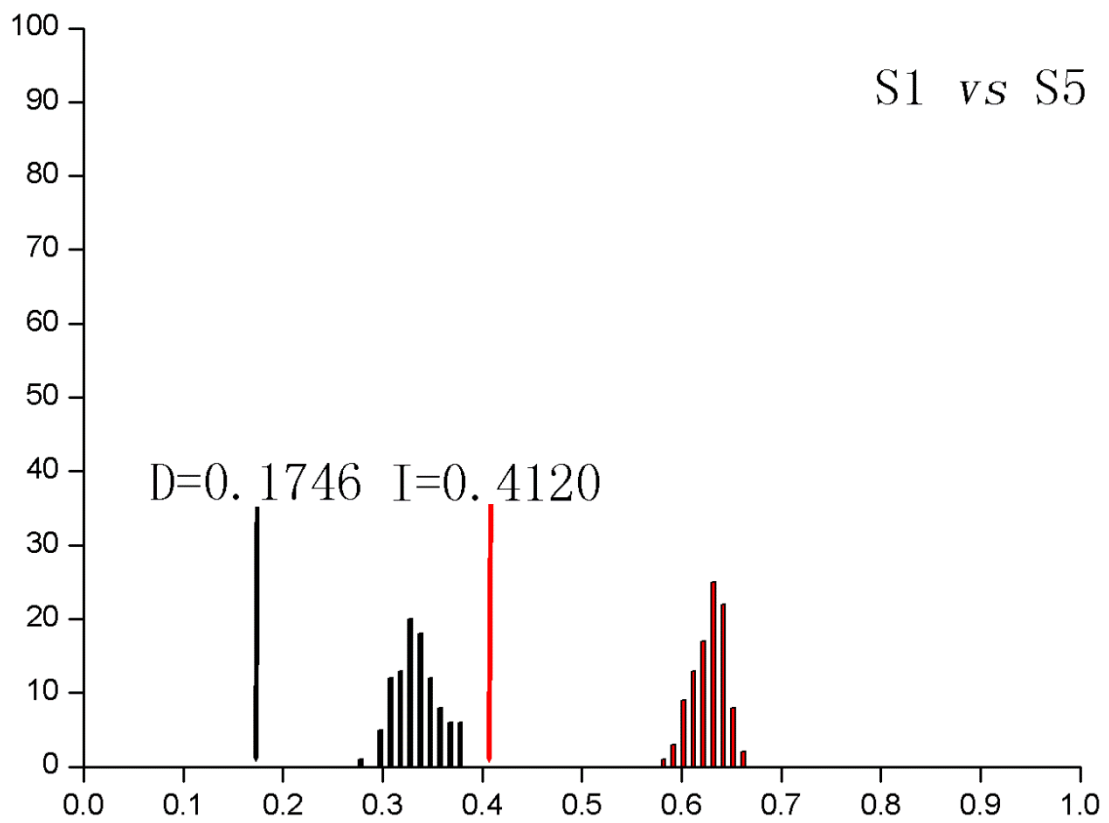

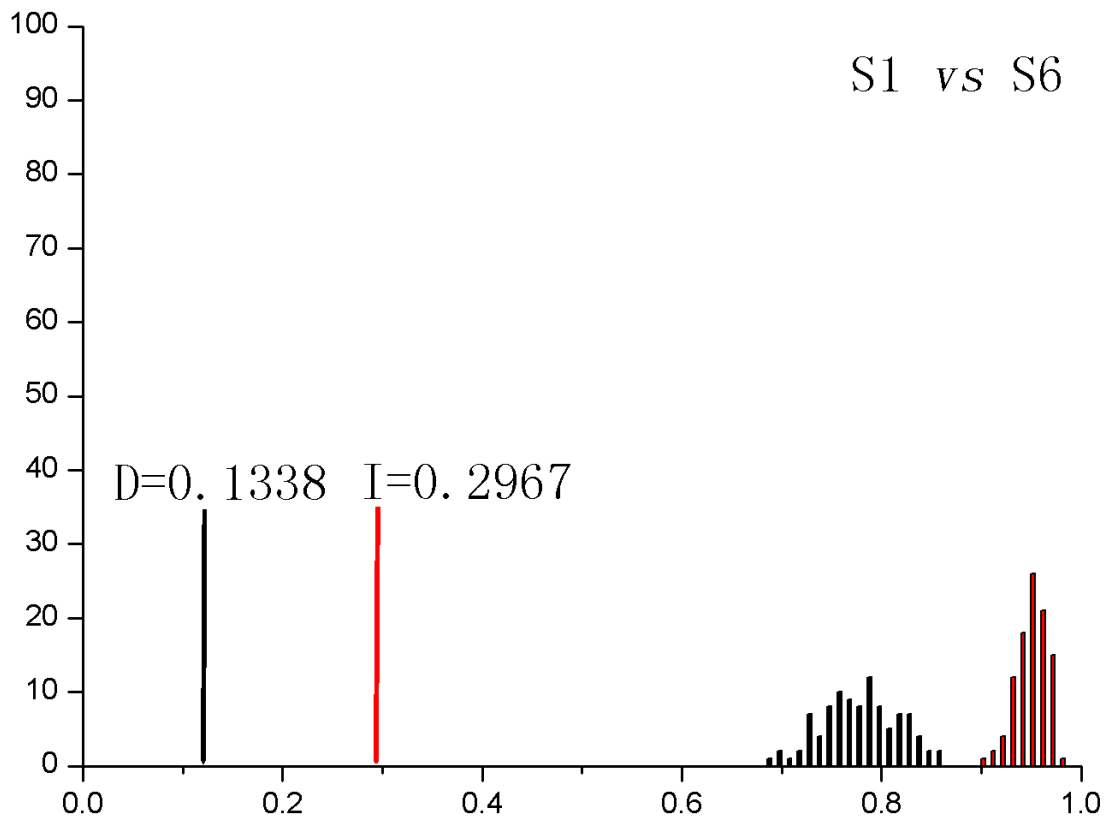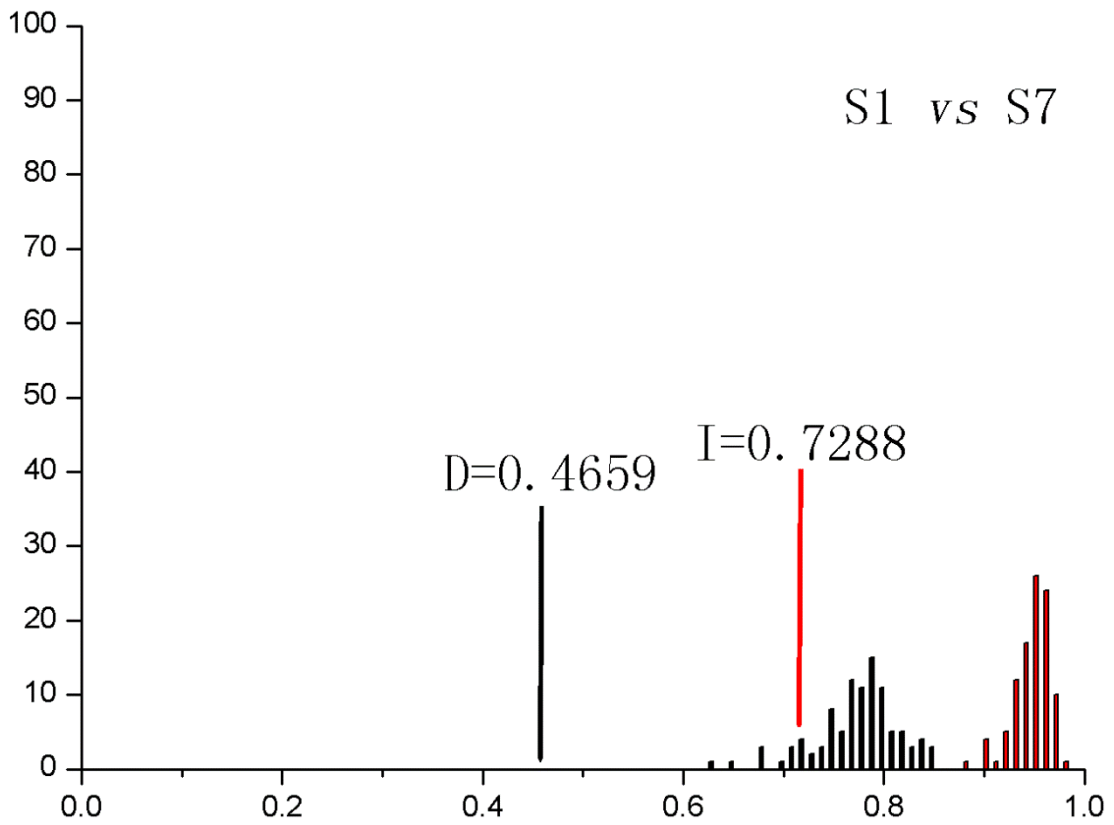

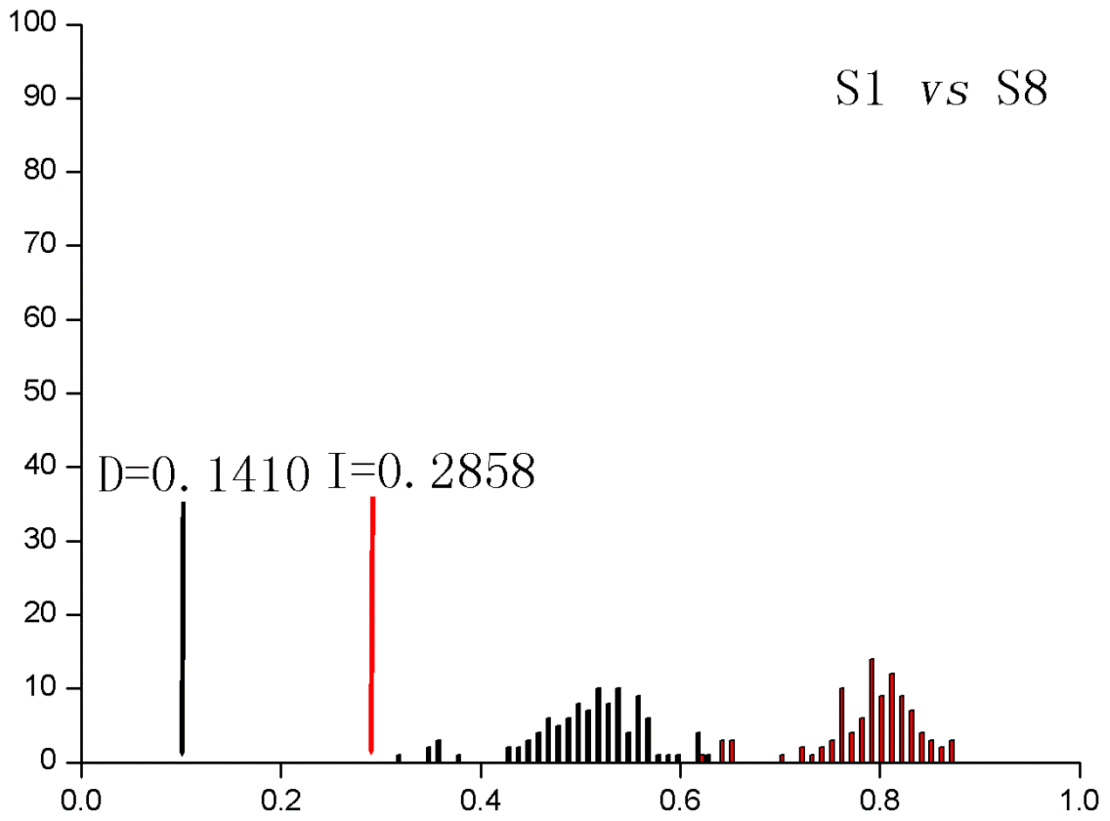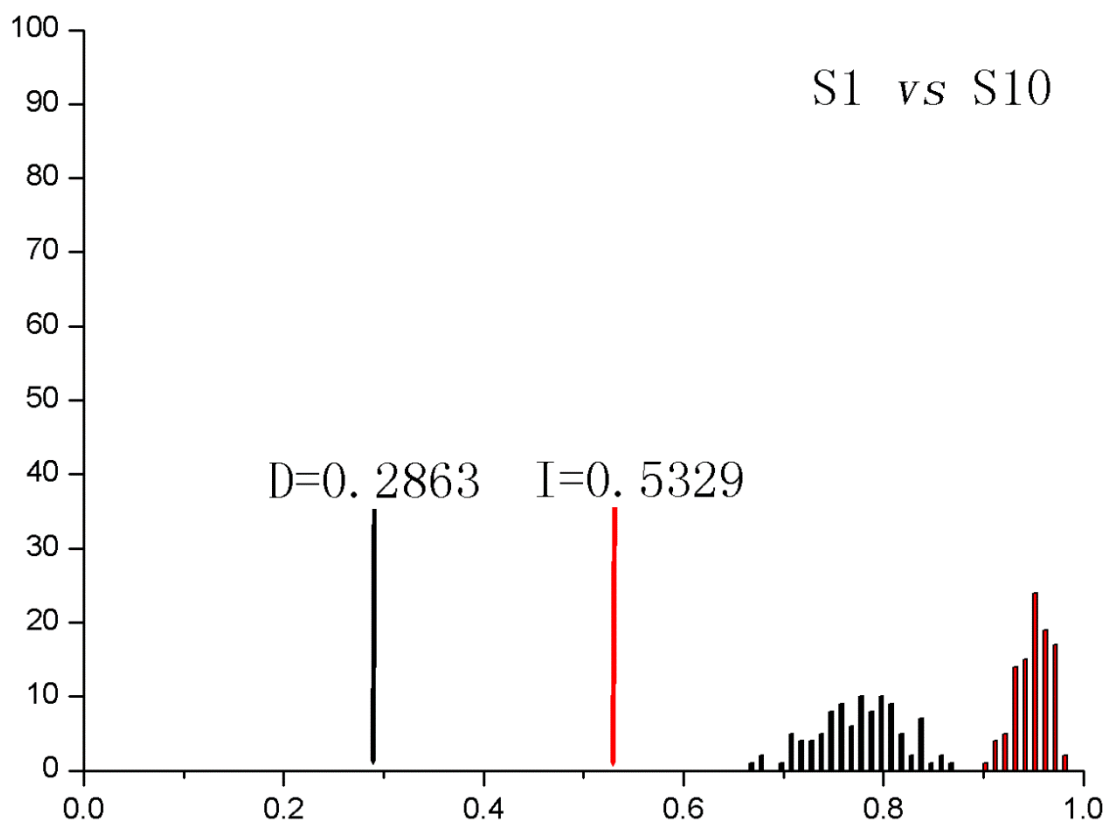

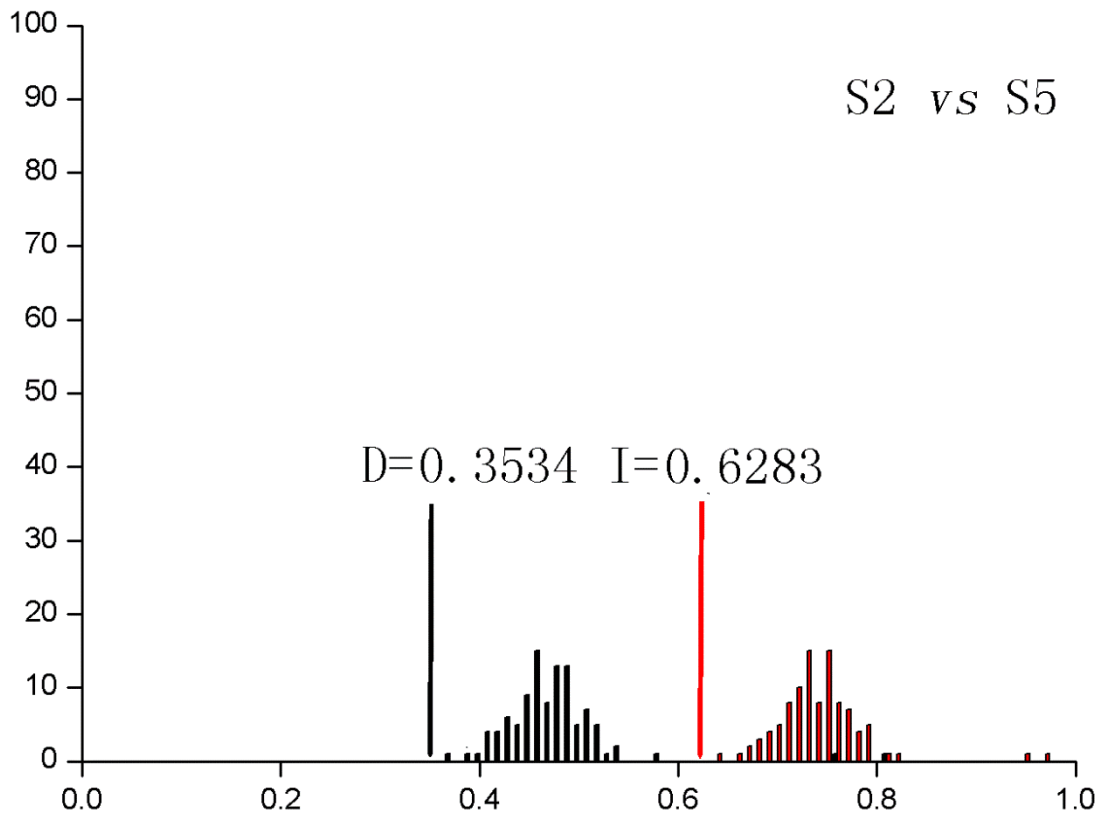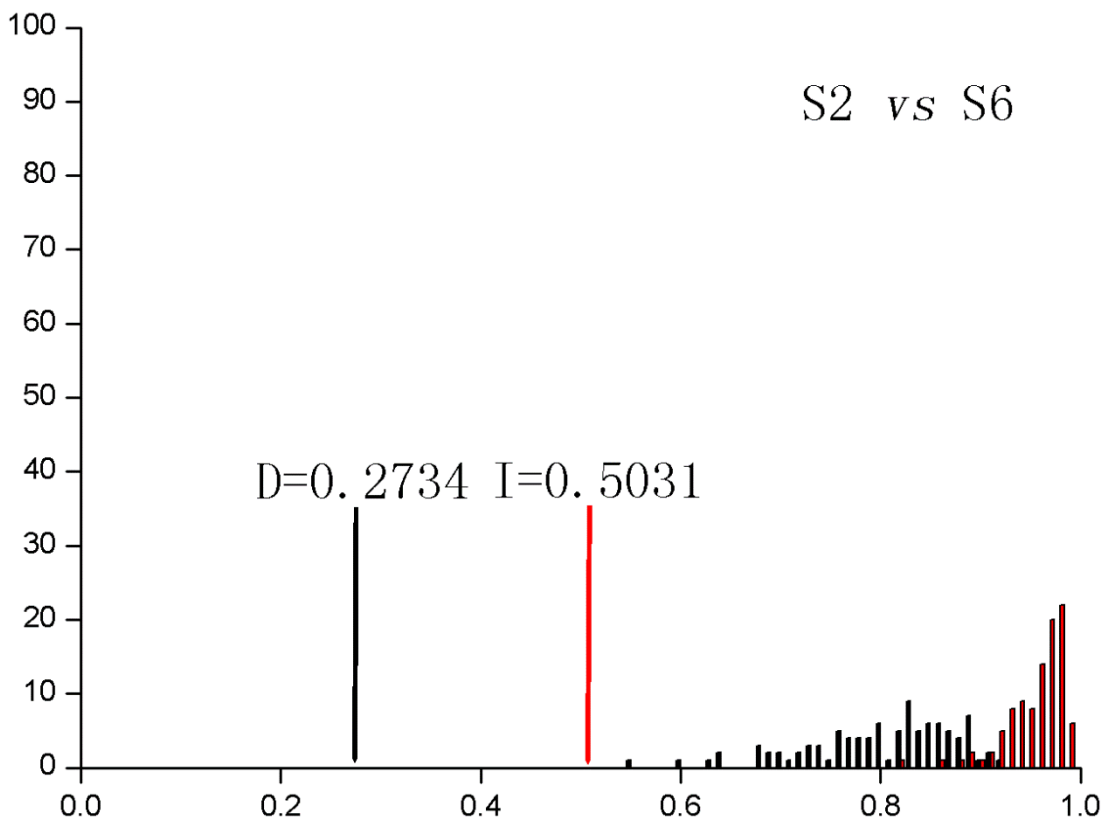

S2 vs S7

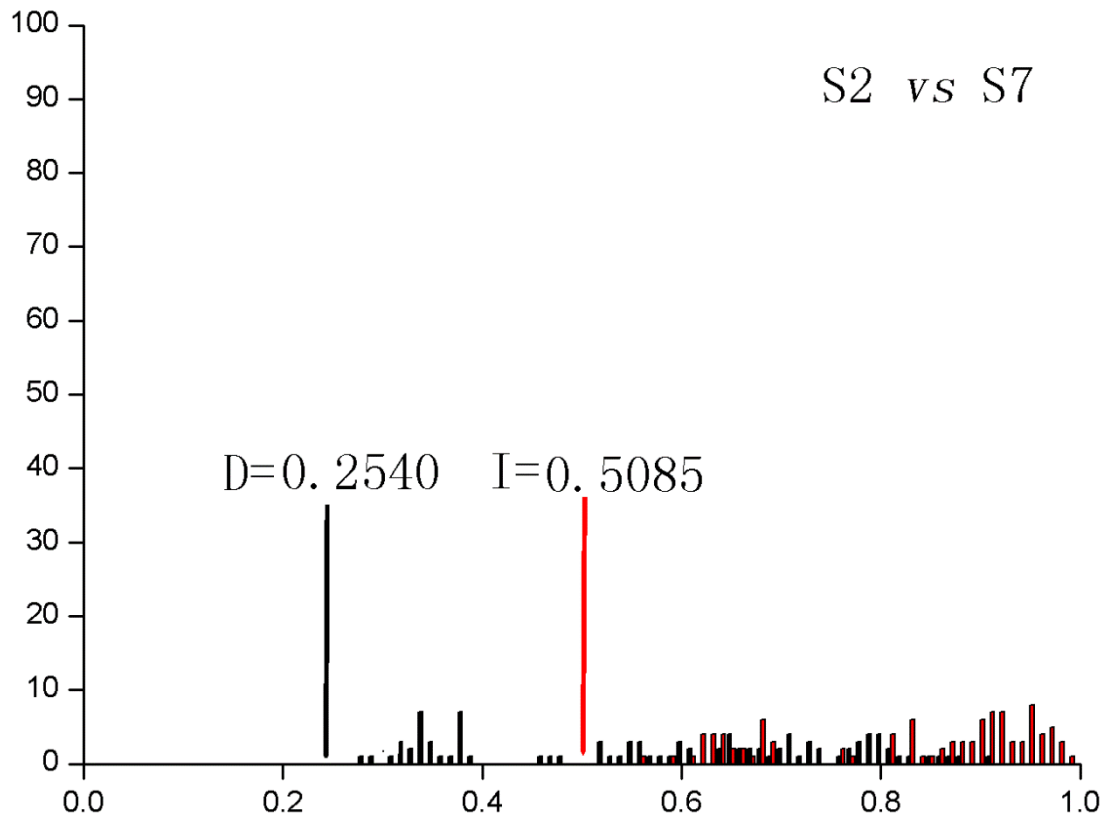

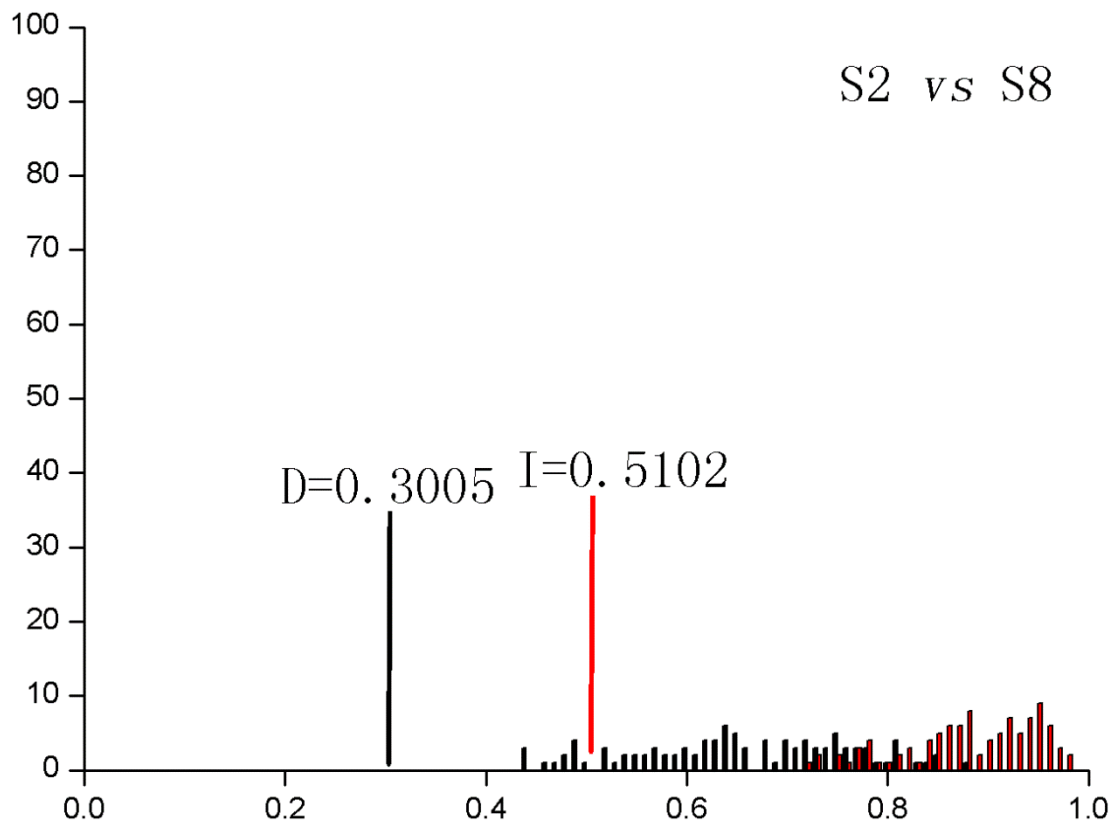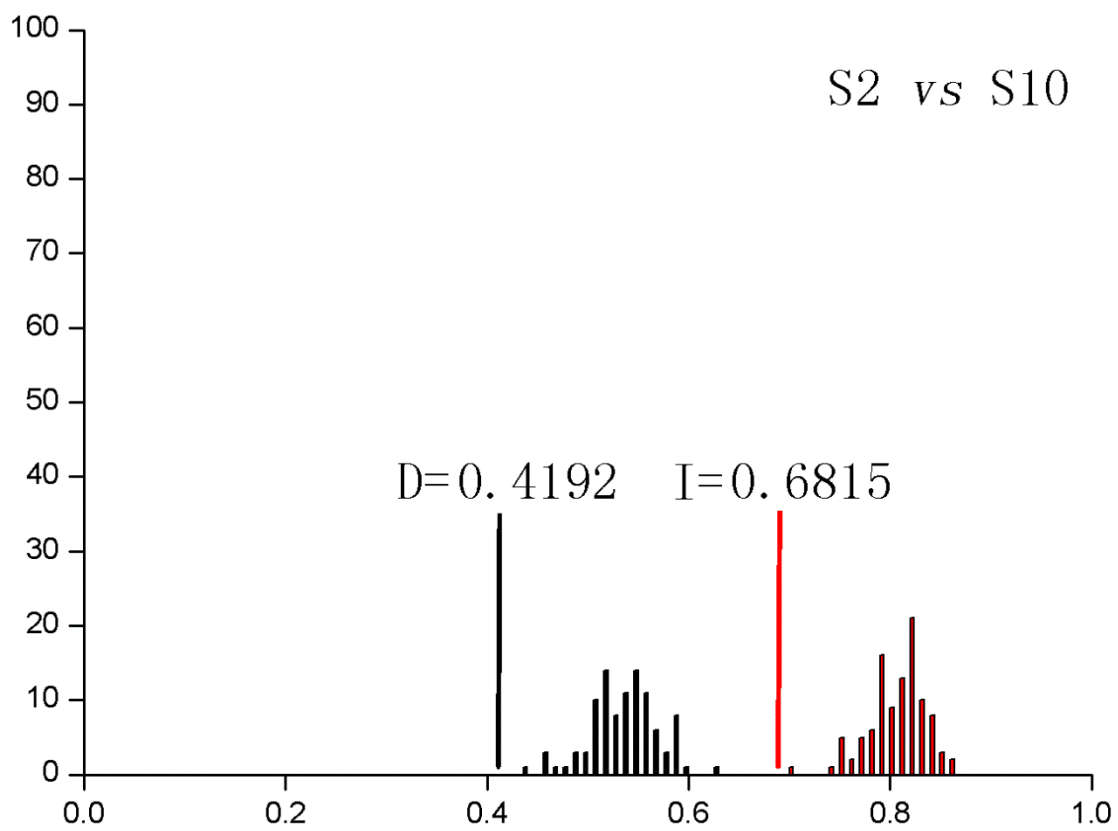

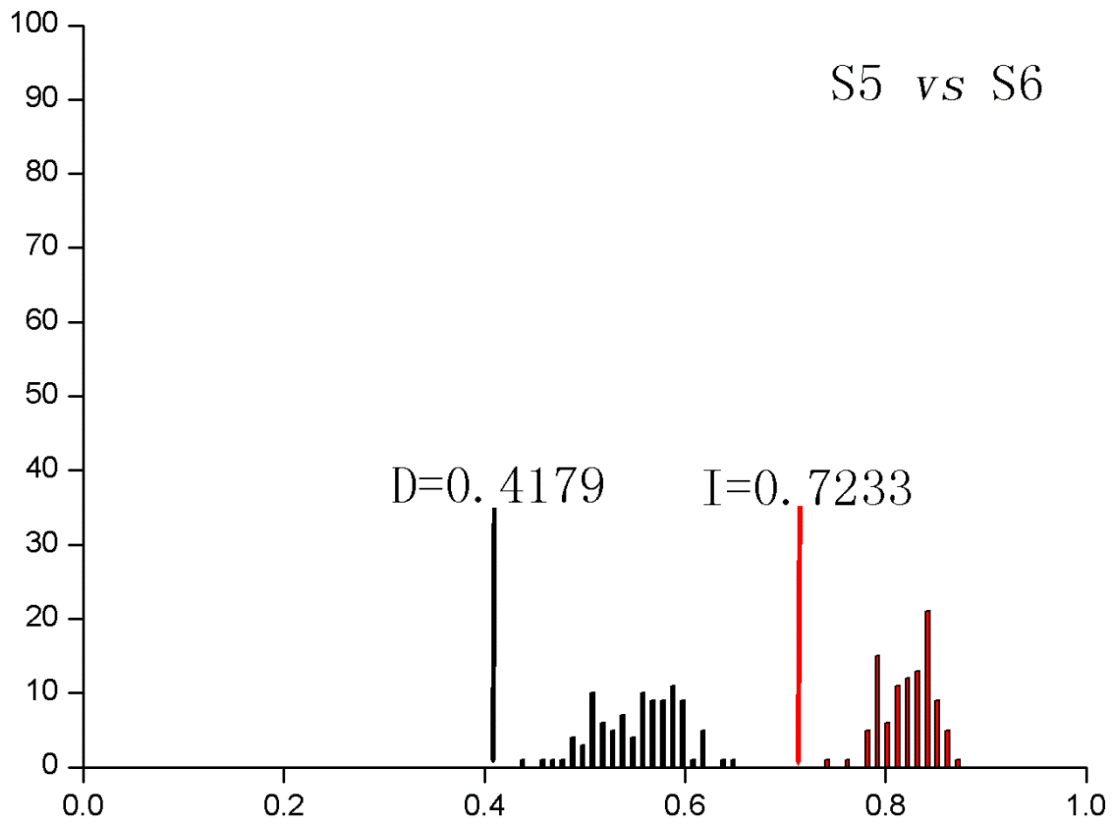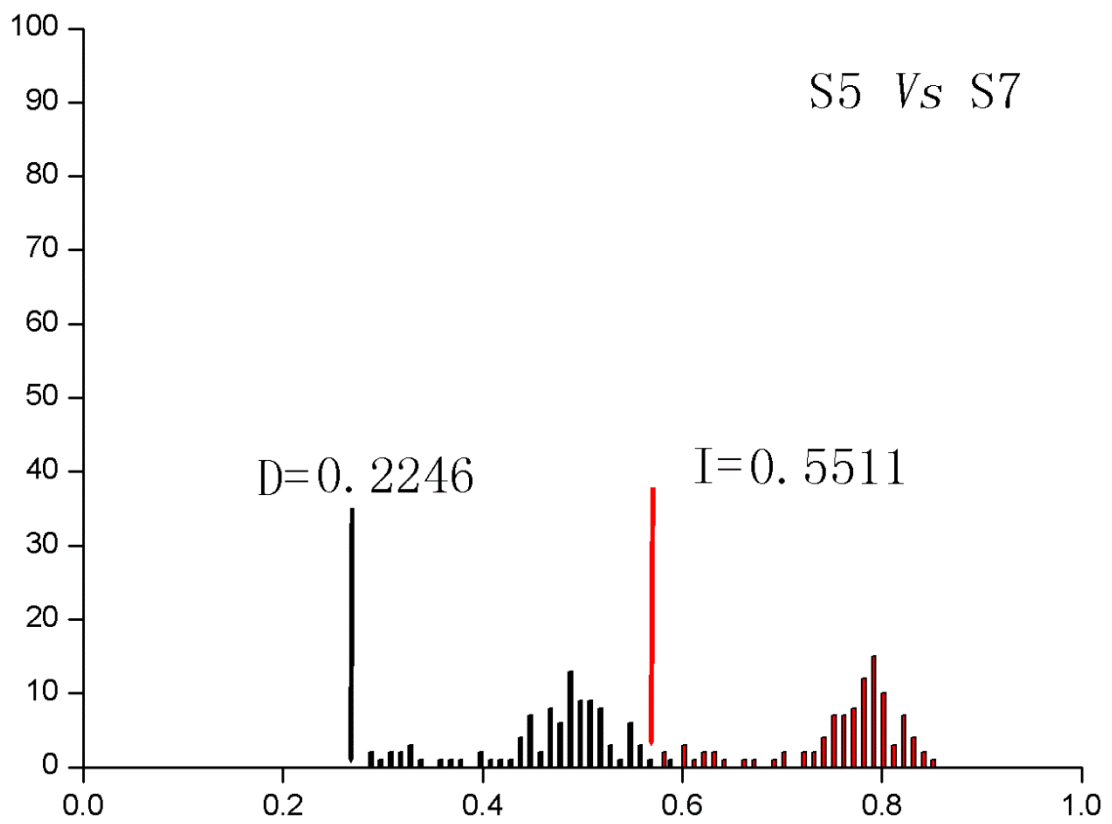

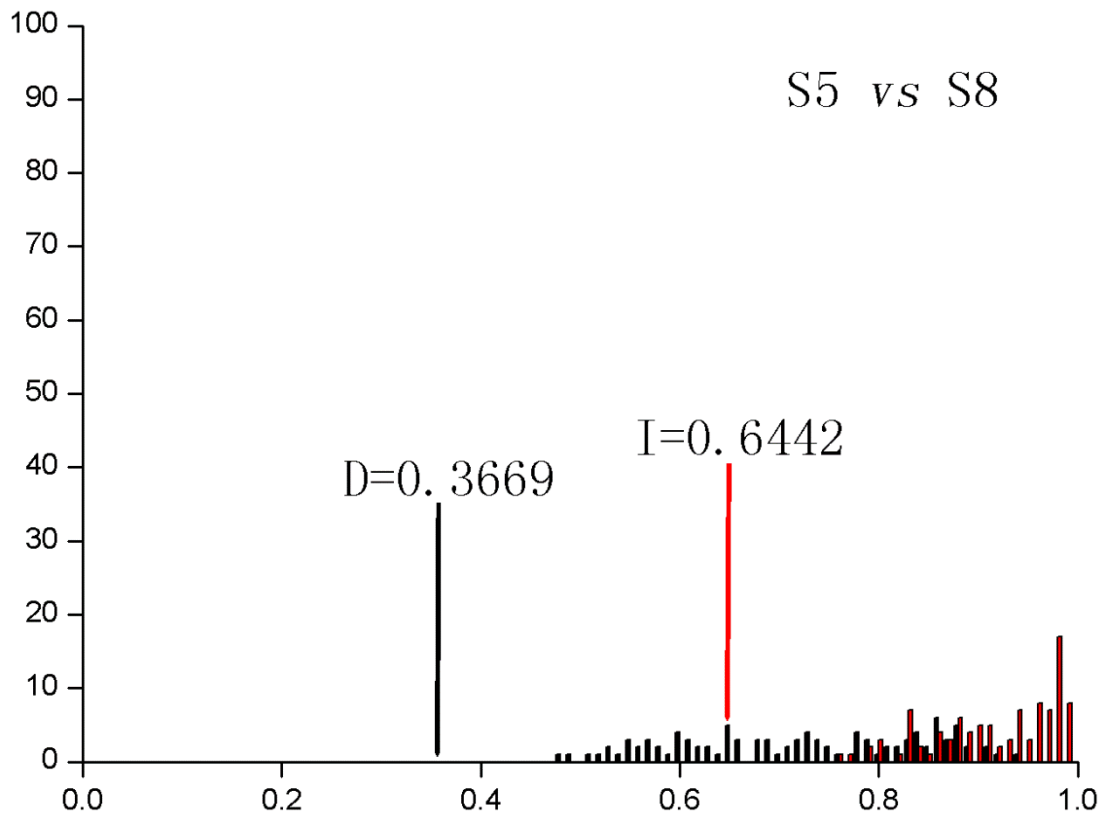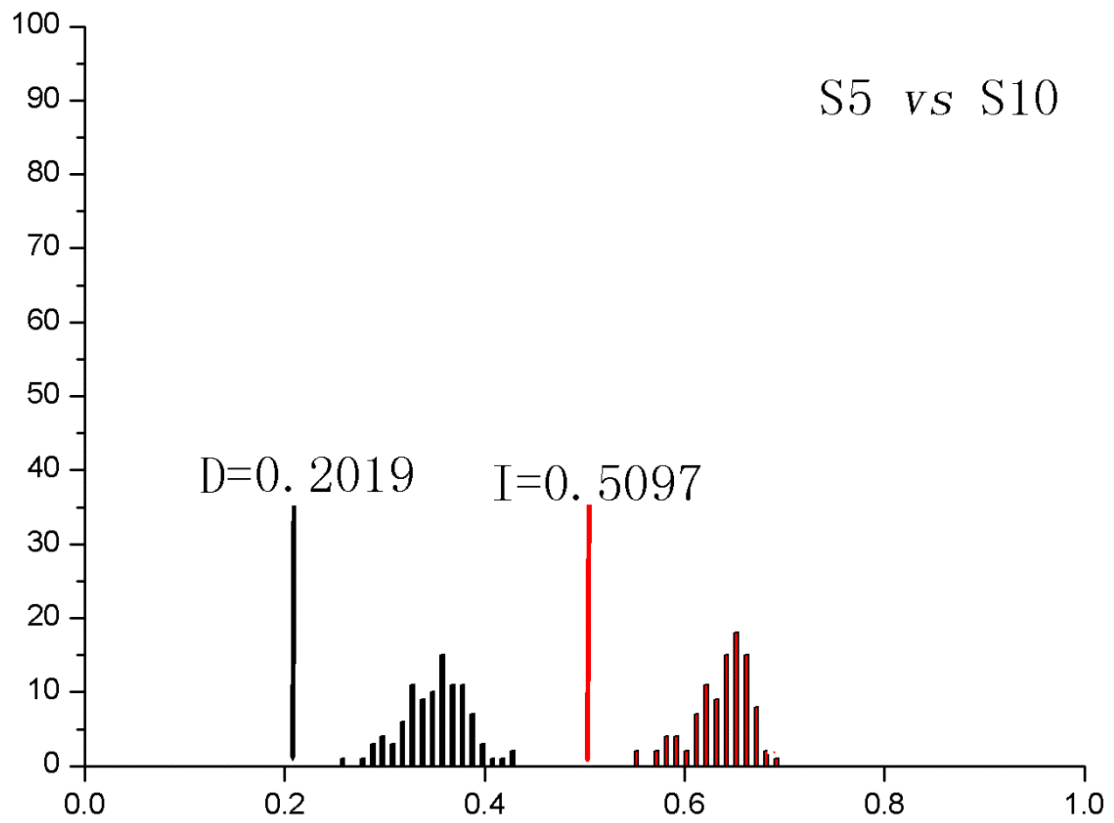



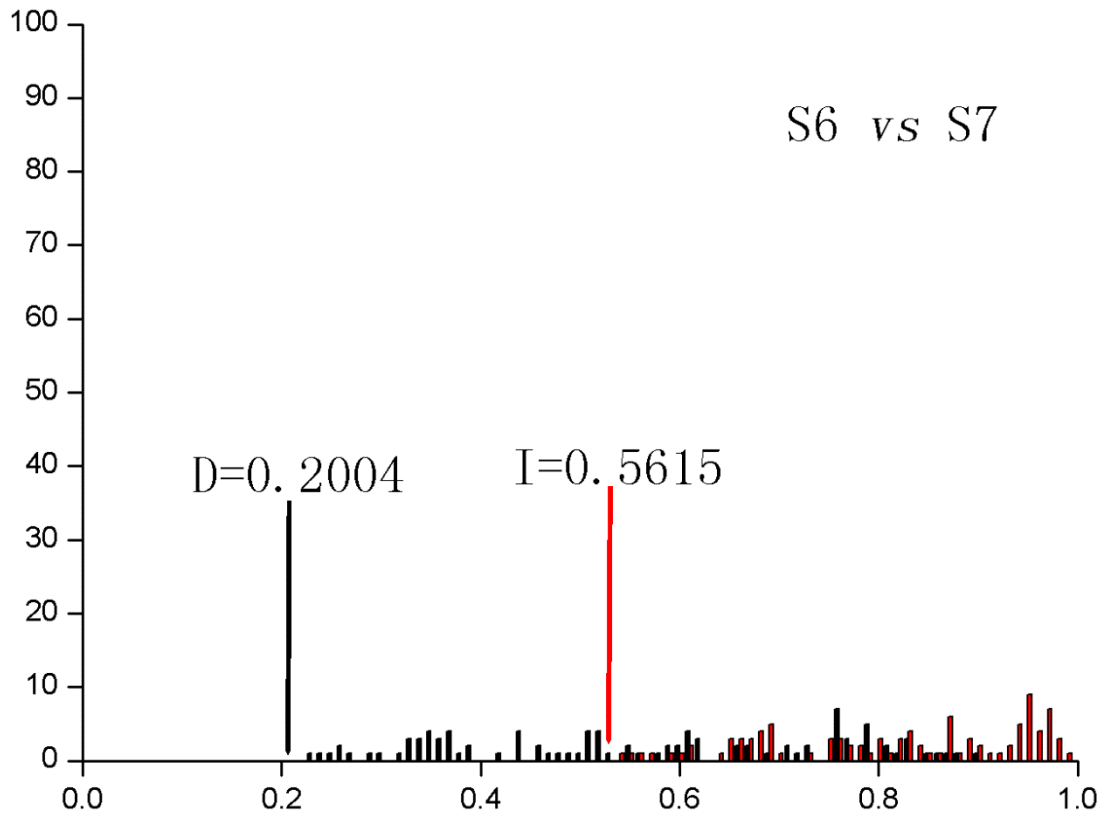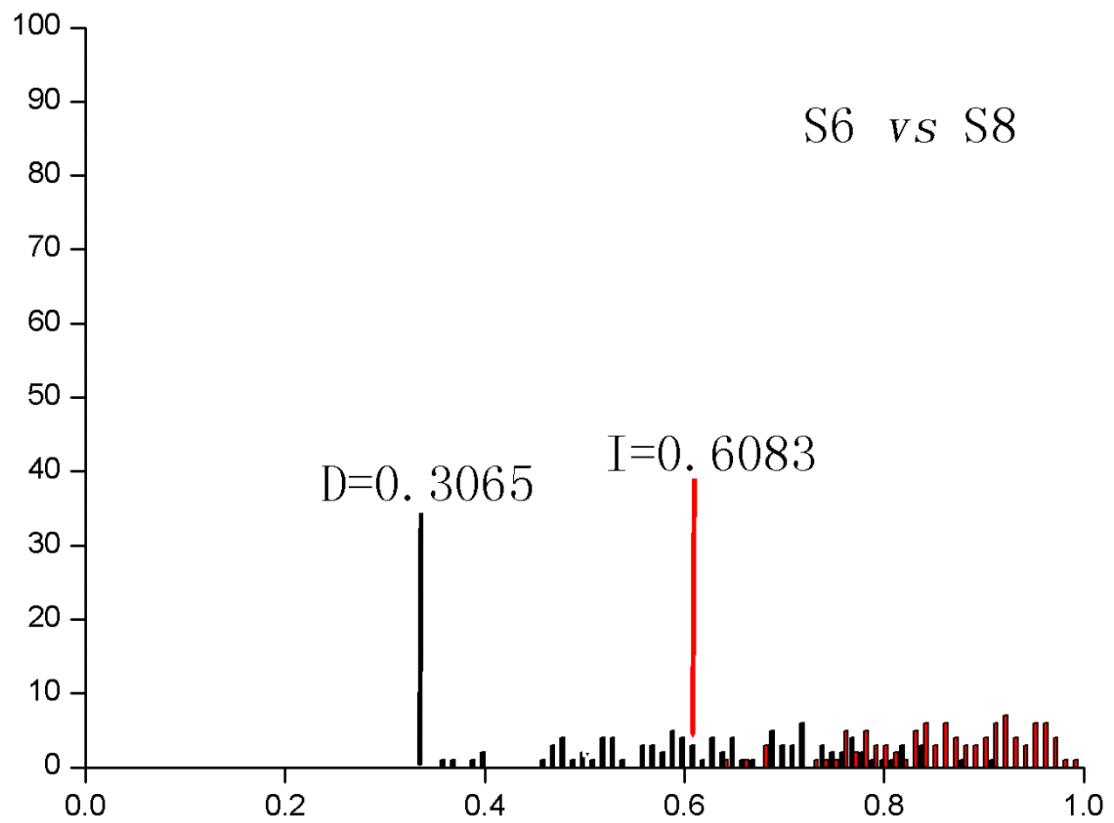

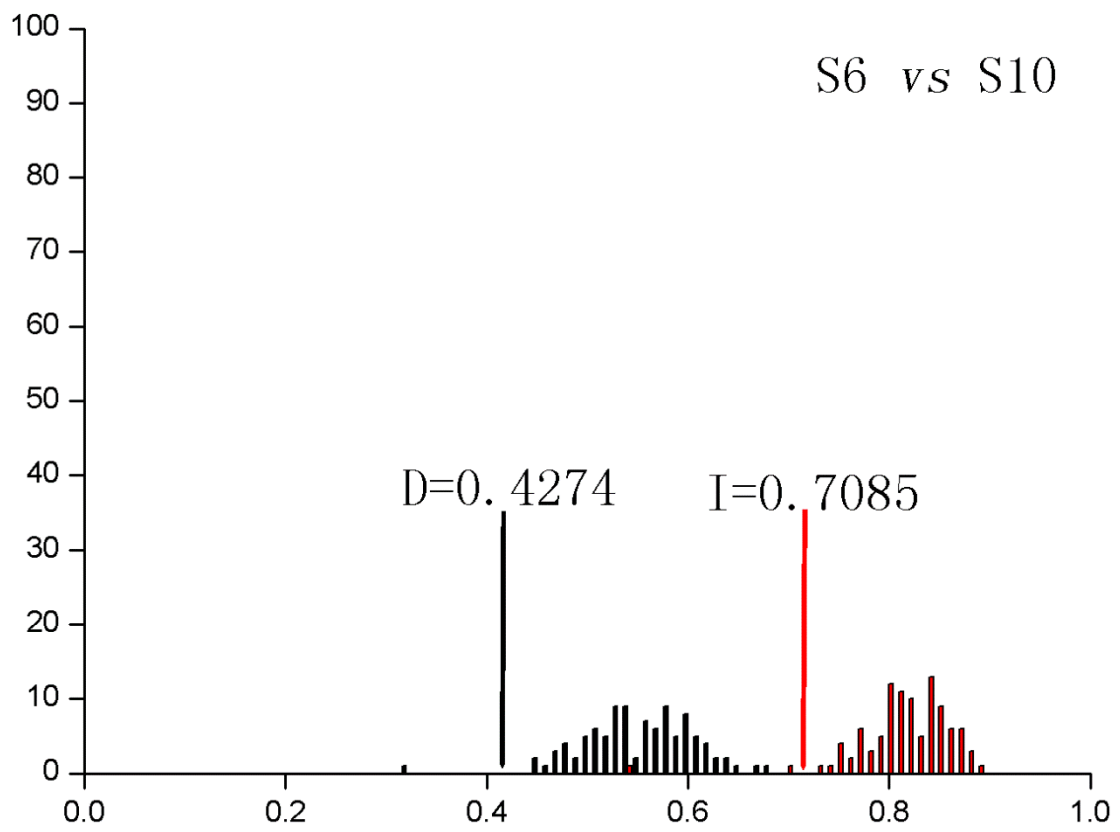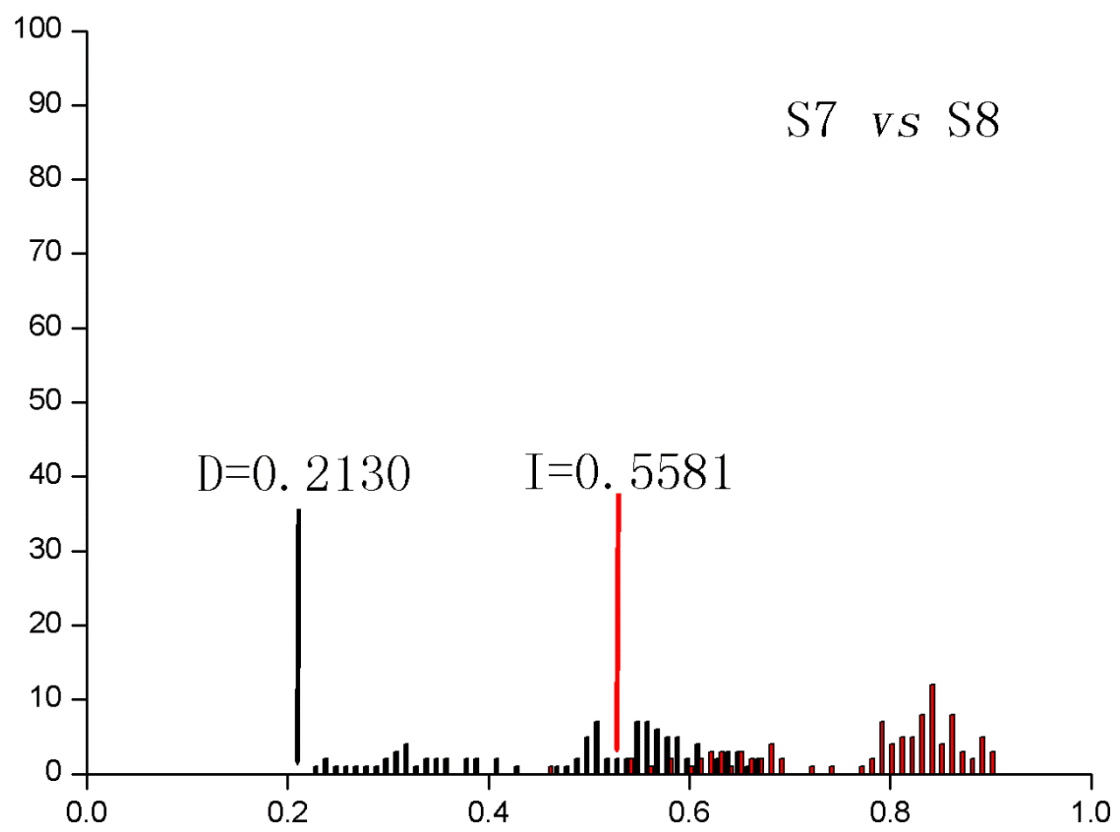

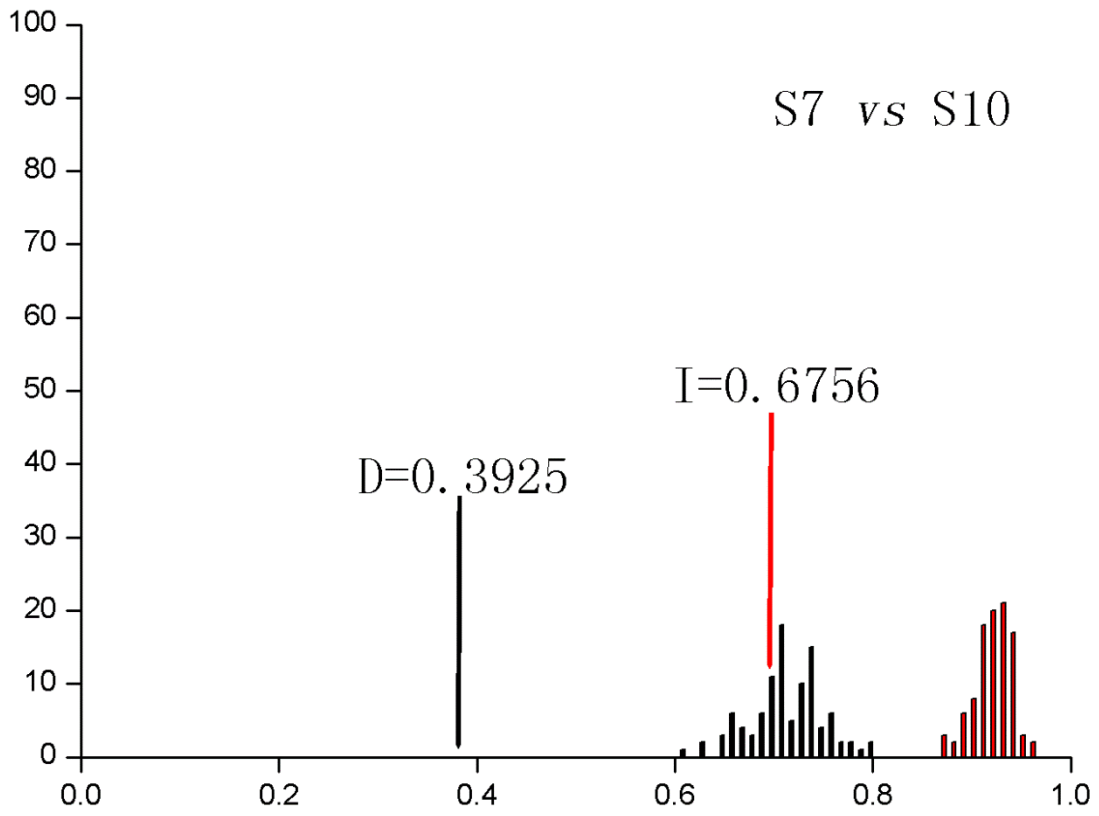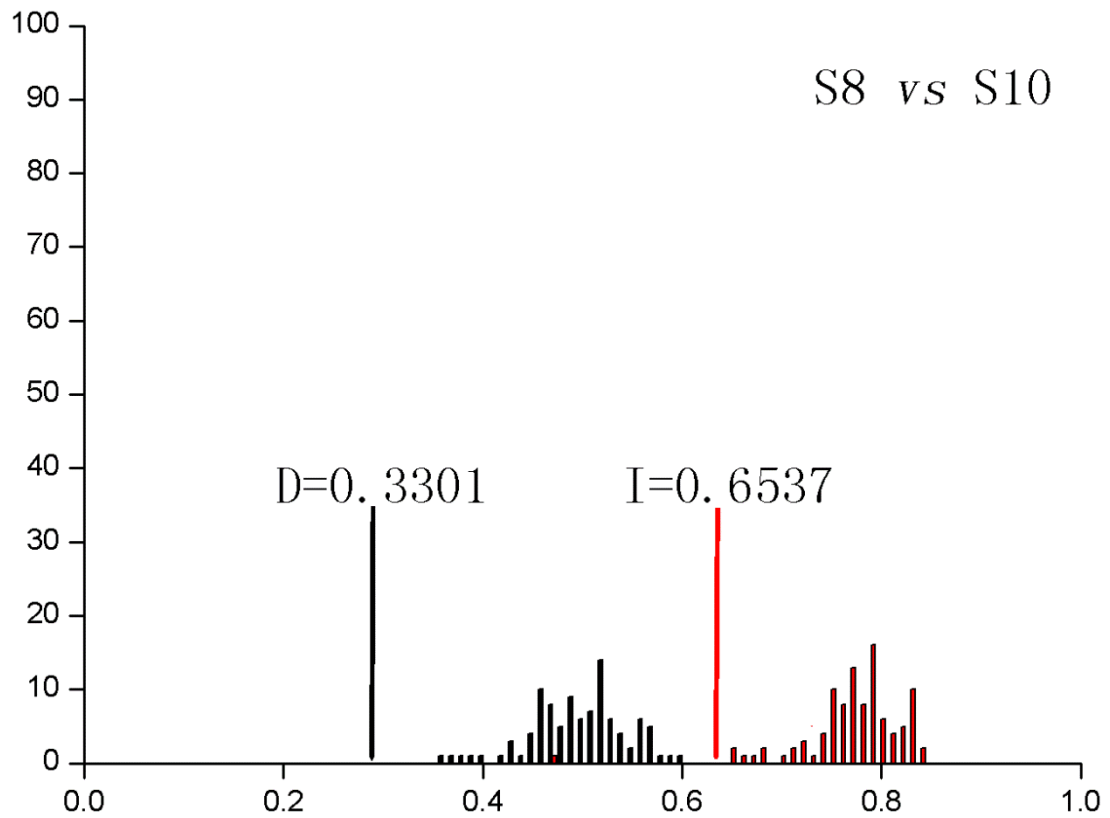

Supplement: Figure_S7.pdf [file Figure_S7.pdf]
