# Supplementary material for: Climatic niche comparison across a cryptic species complex
Source: PeerJ journal article supplement (doi:10.7717/peerj.7042), 2019-05-31

**Figure S2.** Partial-ROC values and graphics; null model (red distribution), distribution of expectations created via bootstrapping replacement of 50% of the total available points and 1,000 resampling replicates (blue distribution).

**S1:** Mean AUC ratio after 1000 simulations: 1.986836 ( P.value=0 )

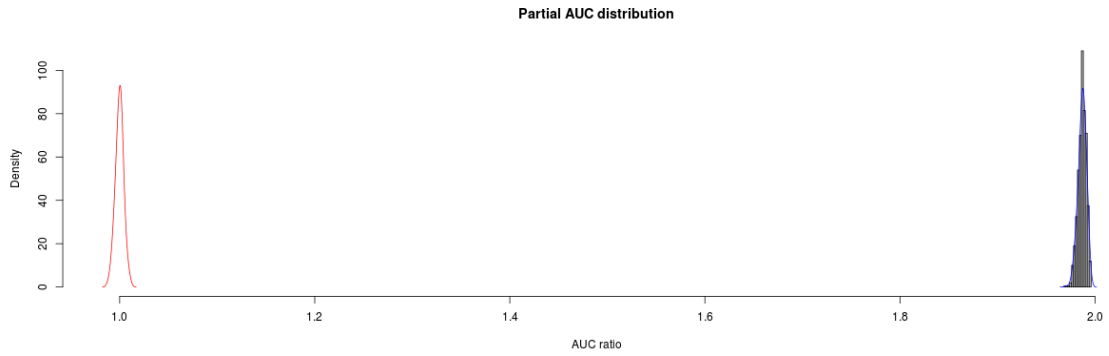

**S2:** Mean AUC ratio after 1000 simulations: 1.984517 ( P.value=0 )

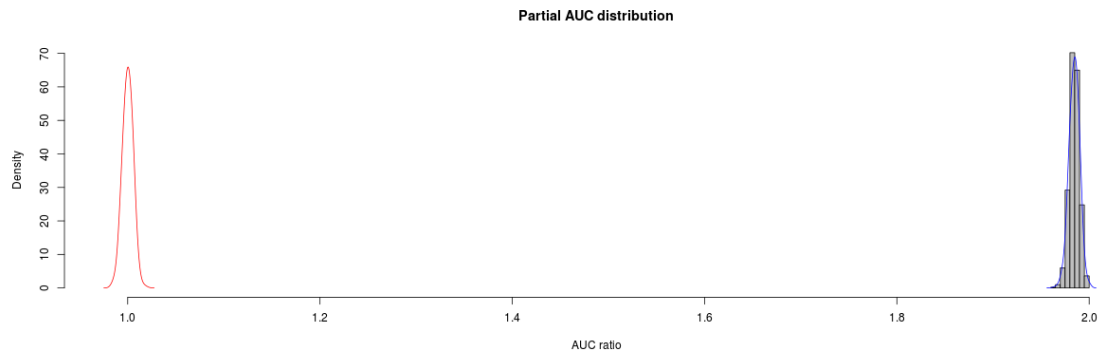

**S5:** Mean AUC ratio after 1000 simulations: 1.929322 ( P.value=0 )

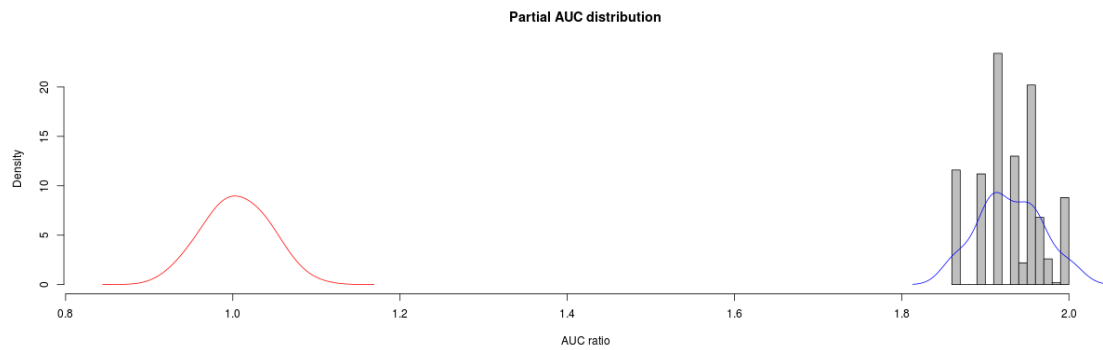

**S6:** Mean AUC ratio after 1000 simulations: 1.97818 ( P.value=0 )

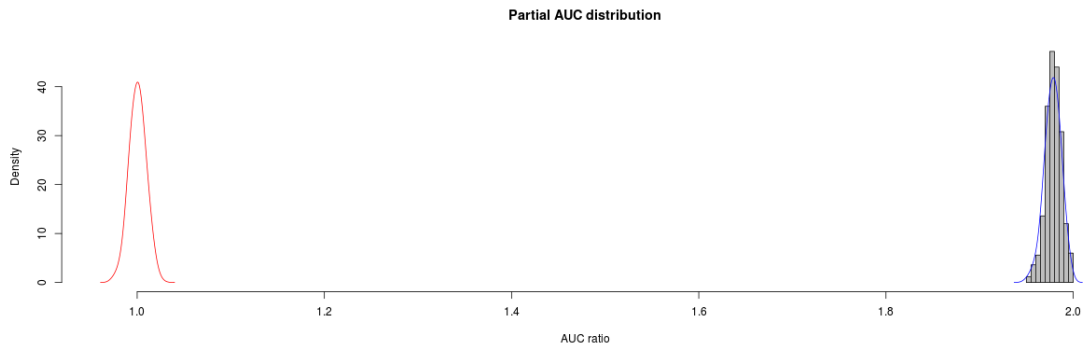

**S7:** Mean AUC ratio after 1000 simulations: 1.976526 ( P.value=0 )

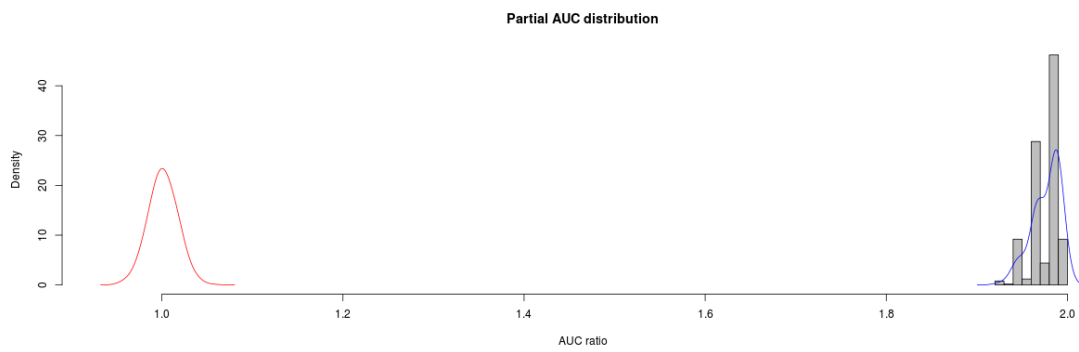

**S8:** Mean AUC ratio after 1000 simulations: 1.991804 ( P.value=0 )

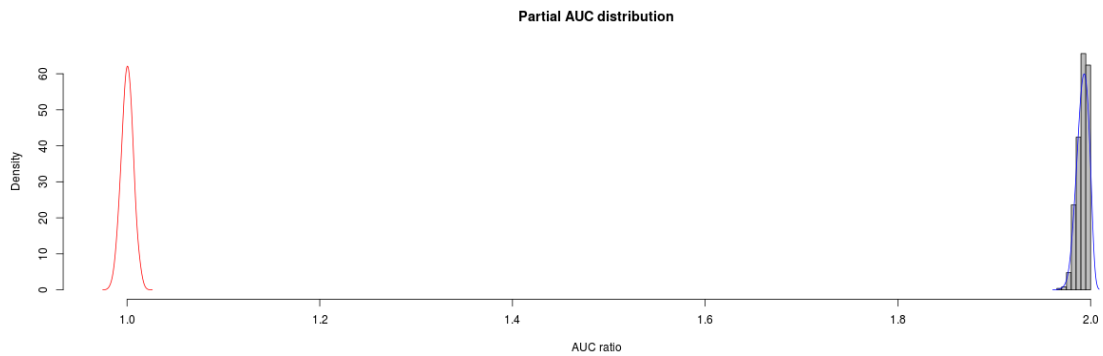

**S10:** Mean AUC ratio after 1000 simulations: 1.93884 ( P.value=0 )

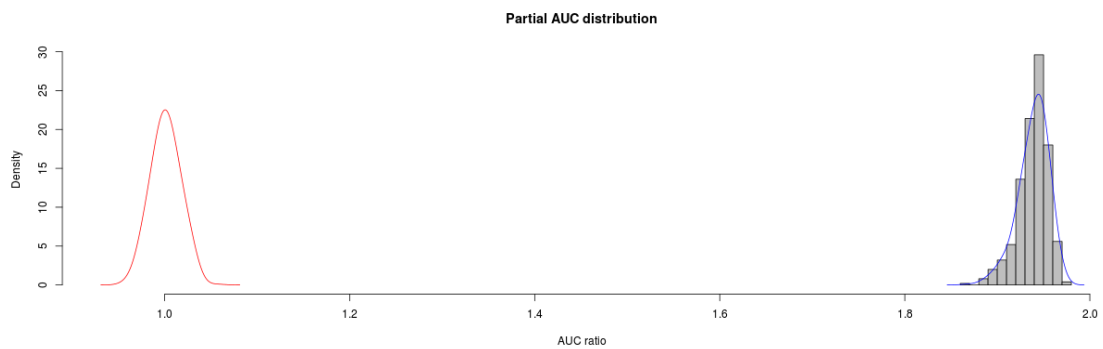

Supplement: Figure_S2.pdf [file Figure_S2.pdf]
