# Supplementary material for: Climatic niche comparison across a cryptic species complex
Source: PeerJ. 2019 May 31;7:e7042. doi: 10.7717/peerj.7042 (PMC6546150; doi:10.7717/peerj.7042)
Supplement: Table S1 [file peerj-07-7042-s001.docx]

|  | Bio1 | Bio2 | Bio3 | Bio4 | Bio5 | Bio6 | Bio7 | Bio8 | Bio9 | Bio10 | Bio11 | Bio12 | Bio13 | Bio14 | Bio15 | Bio16 | Bio17 | Bio18 | Bio19 |
| --- | --- | --- | --- | --- | --- | --- | --- | --- | --- | --- | --- | --- | --- | --- | --- | --- | --- | --- | --- |
| Bio1 | 1 |  |  |  |  |  |  |  |  |  |  |  |  |  |  |  |  |  |  |
| Bio2 | -.130* | 1 |  |  |  |  |  |  |  |  |  |  |  |  |  |  |  |  |  |
| Bio3 | .464** | .379** | 1 |  |  |  |  |  |  |  |  |  |  |  |  |  |  |  |  |
| Bio4 | -.543** | -.142* | **-.958**** | 1 |  |  |  |  |  |  |  |  |  |  |  |  |  |  |  |
| Bio5 | .569** | .190** | -.176** | .213** | 1 |  |  |  |  |  |  |  |  |  |  |  |  |  |  |
| Bio6 | **.901**** | -.129* | .694** | **-.804**** | .276** | 1 |  |  |  |  |  |  |  |  |  |  |  |  |  |
| Bio7 | -.615** | .229** | -.792** | **.923**** | .240** | **-.867**** | 1 |  |  |  |  |  |  |  |  |  |  |  |  |
| Bio8 | .693** | -.098 | .212** | -.220** | .390** | .482** | -.284** | 1 |  |  |  |  |  |  |  |  |  |  |  |
| Bio9 | .399** | .080 | .331** | -.410** | .290** | .545** | -.400** | -.203** | 1 |  |  |  |  |  |  |  |  |  |  |
| Bio10 | .774** | -.249** | -.170** | .108 | **.848**** | .471** | -.035 | .635** | .198** | 1 |  |  |  |  |  |  |  |  |  |
| Bio11 | **.918**** | -.007 | .753** | **-.827**** | .297** | **.982**** | **-.838**** | .546** | .489** | .469** | 1 |  |  |  |  |  |  |  |  |
| Bio12 | .251** | -.430** | -.162** | .050 | .118* | .164** | -.105 | .167** | .013 | .310** | .127* | 1 |  |  |  |  |  |  |  |
| Bio13 | .391** | -.016 | .444** | -.501** | .006 | .483** | -.485** | .188** | .261** | .069 | .486** | .684** | 1 |  |  |  |  |  |  |
| Bio14 | .039 | -.573** | -.643** | .556** | .189** | -.236** | .336** | .196** | -.325** | .438** | -.259** | .590** | -.105 | 1 |  |  |  |  |  |
| Bio15 | .301** | .384** | **.806**** | -.783** | -.126* | .556** | -.627** | .021 | .424** | -.219** | .581** | -.236** | .497** | **-.842**** | 1 |  |  |  |  |
| Bio16 | .365** | -.060 | .395** | -.464** | .001 | .461** | -.465** | .142* | .262** | .068 | .452** | .737** | **.984**** | -.069 | .453** | 1 |  |  |  |
| Bio17 | .044 | -.567** | -.652** | .563** | .208** | -.232** | .342** | .198** | -.305** | .450** | -.257** | .619** | -.079 | **.995**** | -.843** | -.040 | 1 |  |  |
| Bio18 | .506** | -.204** | .040 | -.081 | .256** | .283** | -.154** | .668** | -.181** | .501** | .344** | .528** | .452** | .468** | -.142* | .414** | .486** | 1 |  |
| Bio19 | -.204** | -.256** | -.293** | .197** | -.037 | -.086 | .068 | -.453** | .279** | -.075 | -.203** | .492** | .293** | .103 | -.041 | .368** | .133* | -.340** | 1 |

Table S1 Correlation analysis of environmental variables

**: significant at the 0.05 level *: significant at the 0.1 level
