# Supplementary material for: Climatic niche comparison across a cryptic species complex
Source: PeerJ. 2019 May 31;7:e7042. doi: 10.7717/peerj.7042 (PMC6546150; doi:10.7717/peerj.7042)
Supplement: Table S2 [file peerj-07-7042-s002.xlsx]

## Sheet: Sheet1
Table S4 ENMeval results for species from SDMs
	settings	features	rm	full.AUC	Mean.AUC	Var.AUC	Meann.AUC.DIFF	Var.AUC.DIFF	Mean.OR10	Var.OR10	Mean.ORmin	Var.ORmin	AICc	delta.AICc	w.AIC	nparam
S1
1	L_0.5	L	0.5	0.8173	0.799587	0.00306664	0.0176583	0.000688877	0.208063	0.0317463	0.0584416	0.00500365	1011.48	228.722	1.43002e-50	5
2	LQ_0.5	LQ	0.5	0.9911	0.985747	0.000487954	0.00805418	0.000530231	0.172078	0.0664952	0.113636	0.0516529	782.754	0	0.663143	10
3	LQH_0.5	LQH	0.5	0.9962	0.990638	0.000261239	0.00669014	0.000264367	0.220779	0.0651037	0.0909091	0.0330579	823.464	40.7103	9.58259e-10	22
4	LQHP_0.5	LQHP	0.5	0.9963	0.990597	0.00026209	0.00663114	0.000272425	0.243506	0.0813375	0.0909091	0.0330579	922.459	139.705	3.05572e-31	26
5	LQHPT_0.5	LQHPT	0.5	0.9963	0.990597	0.00026209	0.00663114	0.000272425	0.243506	0.0813375	0.0909091	0.0330579	922.459	139.705	3.05572e-31	26
6	L_1	L	1	0.8196	0.80978	0.00220207	0.0124633	0.000927015	0.208063	0.0317463	0.0584416	0.00500365	1011.83	229.076	1.19803e-50	5
7	LQ_1	LQ	1	0.9881	0.98336	0.00039717	0.00775318	0.000378441	0.192911	0.0586714	0.0909091	0.0330579	806.612	23.8584	4.37349e-06	11
8	LQH_1	LQH	1	0.9947	0.991096	0.000236188	0.00564305	0.000236389	0.198052	0.0530022	0.0909091	0.0330579	815.269	32.5149	5.76872e-08	20
9	LQHP_1	LQHP	1	0.9945	0.991746	0.000184889	0.0048211	0.000188533	0.198052	0.0530022	0.0909091	0.0330579	786.897	4.14353	0.0835319	17
10	LQHPT_1	LQHPT	1	0.9945	0.991746	0.000184889	0.0048211	0.000188533	0.198052	0.0530022	0.0909091	0.0330579	786.897	4.14353	0.0835319	17
11	L_1.5	L	1.5	0.8211	0.814474	0.00197361	0.0103803	0.00117066	0.208063	0.0317463	0.0584416	0.00500365	1012.28	229.531	9.54114e-51	5
12	LQ_1.5	LQ	1.5	0.9848	0.980747	0.000413377	0.00804344	0.000311187	0.170184	0.0393713	0.0454546	0.00826446	822.534	39.7802	1.52566e-09	11
13	LQH_1.5	LQH	1.5	0.994	0.99064	0.000236715	0.00544389	0.000247803	0.162338	0.03615	0.0909091	0.0330579	794.256	11.5022	0.00210833	17
14	LQHP_1.5	LQHP	1.5	0.9936	0.991797	0.000160912	0.0043183	0.000175312	0.185065	0.050416	0.0454546	0.00826446	786.903	4.14932	0.0832901	16
15	LQHPT_1.5	LQHPT	1.5	0.9936	0.991797	0.000160912	0.0043183	0.000175312	0.185065	0.050416	0.0454546	0.00826446	786.903	4.14932	0.0832901	16
16	L_2	L	2	0.8213	0.817316	0.00172497	0.00964592	0.00108463	0.208063	0.0317463	0.0357143	0.00510204	1012.84	230.088	7.22222e-51	5
17	LQ_2	LQ	2	0.981	0.978119	0.000515123	0.00857921	0.000311952	0.170184	0.0393713	0.0227273	0.00206612	832.179	49.4248	1.22787e-11	10
18	LQH_2	LQH	2	0.993	0.990097	0.000227766	0.00524337	0.00024512	0.149351	0.0459324	0.0454546	0.00826446	795.558	12.804	0.00109966	16
19	LQHP_2	LQHP	2	0.9927	0.991398	0.000170686	0.0043704	0.0001868	0.149351	0.0459324	0.0454546	0.00826446	821.975	39.2207	2.01807e-09	19
20	LQHPT_2	LQHPT	2	0.9927	0.991398	0.000170686	0.0043704	0.0001868	0.149351	0.0459324	0.0454546	0.00826446	821.975	39.2207	2.01807e-09	19
21	L_2.5	L	2.5	0.8207	0.821301	0.00106611	0.00861821	0.000865817	0.162608	0.0321727	0.0357143	0.00510204	1013.5	230.748	5.19251e-51	5
22	LQ_2.5	LQ	2.5	0.9782	0.97561	0.000638355	0.00914946	0.0003378	0.149351	0.0459324	0.0227273	0.00206612	843.176	60.4225	5.02385e-14	10
23	LQH_2.5	LQH	2.5	0.9917	0.989427	0.000228235	0.00516924	0.000229595	0.149351	0.0459324	0.0454546	0.00826446	821.79	39.0364	2.21292e-09	18
24	LQHP_2.5	LQHP	2.5	0.9917	0.990906	0.000184808	0.00449731	0.000206793	0.149351	0.0459324	0.0454546	0.00826446	856.363	73.609	6.88045e-17	21
25	LQHPT_2.5	LQHPT	2.5	0.9917	0.990906	0.000184808	0.00449731	0.000206793	0.149351	0.0459324	0.0454546	0.00826446	856.363	73.609	6.88045e-17	21
26	L_3	L	3	0.8197	0.821994	0.000590272	0.00736857	0.000632934	0.139881	0.0385842	0.0357143	0.00510204	1011.41	228.658	1.47594e-50	4
27	LQ_3	LQ	3	0.9757	0.972949	0.000774417	0.00976941	0.00037561	0.149351	0.0459324	0.0227273	0.00206612	853.517	70.7636	2.85427e-16	10
28	LQH_3	LQH	3	0.9904	0.988707	0.000259026	0.00542827	0.000252734	0.149351	0.0459324	0.0454546	0.00826446	822.438	39.6844	1.60052e-09	17
29	LQHP_3	LQHP	3	0.991	0.99051	0.000206412	0.00458475	0.000230241	0.149351	0.0459324	0.0454546	0.00826446	831.284	48.5305	1.92014e-11	18
30	LQHPT_3	LQHPT	3	0.991	0.99051	0.000206412	0.00458475	0.000230241	0.149351	0.0459324	0.0454546	0.00826446	831.284	48.5305	1.92014e-11	18
31	L_3.5	L	3.5	0.8182	0.82138	0.00039121	0.00672661	0.000489827	0.162608	0.0321727	0.0584416	0.00500365	1012	229.242	1.10221e-50	4
32	LQ_3.5	LQ	3.5	0.9734	0.970408	0.000910661	0.0103389	0.000417084	0.149351	0.0459324	0.0227273	0.00206612	863.625	80.8712	1.8224e-18	10
33	LQH_3.5	LQH	3.5	0.9893	0.988105	0.0002786	0.00561485	0.000262382	0.126623	0.0295019	0.0454546	0.00826446	816.164	33.4102	3.68697e-08	15
34	LQHP_3.5	LQHP	3.5	0.9902	0.989941	0.000237308	0.00481368	0.000258936	0.126623	0.0295019	0.0454546	0.00826446	823.16	40.4065	1.11544e-09	16
35	LQHPT_3.5	LQHPT	3.5	0.9902	0.989941	0.000237308	0.00481368	0.000258936	0.126623	0.0295019	0.0454546	0.00826446	823.16	40.4065	1.11544e-09	16
36	L_4	L	4	0.816	0.81982	0.000281703	0.00604927	0.00033225	0.23079	0.0377315	0.0811688	0.0090375	1012.67	229.913	7.88326e-51	4
37	LQ_4	LQ	4	0.9712	0.967546	0.00101776	0.0108895	0.000461554	0.149351	0.0459324	0.0227273	0.00206612	873.918	91.1647	1.06036e-20	10
38	LQH_4	LQH	4	0.9885	0.987401	0.000301312	0.00588517	0.000274271	0.126623	0.0295019	0.0454546	0.00826446	821.696	38.9419	2.32002e-09	15
39	LQHP_4	LQHP	4	0.9899	0.989329	0.000272055	0.00507714	0.000290885	0.126623	0.0295019	0.0454546	0.00826446	829.17	46.4161	5.52694e-11	16
40	LQHPT_4	LQHPT	4	0.9899	0.989329	0.000272055	0.00507714	0.000290885	0.126623	0.0295019	0.0454546	0.00826446	829.17	46.4161	5.52694e-11	16
S2
	Settings	features	rm	full.AUC	Mean.AUC	Var.AUC	Mean.AUC.DIFF	Var.AUC.DIFF	Mean.OR10	Var.OR10	Mean.ORmin	Var.ORmin	AICc	delta.AICc	w.AIC	nparam
1	L_0.5	L	0.5	0.9343	0.887053	0.0345902	0.058915	0.0281366	0.291667	0.229167	0.0416667	0.00694444	388.883	15.2861	0.000473844	6
2	LQ_0.5	LQ	0.5	0.9951	0.990766	0.000120087	0.00472812	8.72937e-05	0.375	0.229167	0.333333	0.222222	389.556	15.9597	0.000338354	10
3	LQH_0.5	LQH	0.5	0.9988	0.989718	0.000317276	0.00882825	0.000317915	0.466667	0.204444	0.375	0.229167	NA	NA	NA	32
4	LQHP_0.5	LQHP	0.5	0.9988	0.991823	0.000151402	0.00674798	0.00015834	0.466667	0.204444	0.416667	0.25	NA	NA	NA	33
5	LQHPT_0.5	LQHPT	0.5	0.9988	0.991823	0.000151402	0.00674798	0.00015834	0.466667	0.204444	0.416667	0.25	NA	NA	NA	33
6	L_1	L	1	0.9331	0.883204	0.0377135	0.0620403	0.0311046	0.291667	0.229167	0.0416667	0.00694444	390.001	16.4042	0.000270926	6
7	LQ_1	LQ	1	0.993	0.986556	0.000100893	0.00491875	9.17991e-05	0.0833333	0.0277778	0.0833333	0.0277778	373.596	0	0.988487	9
8	LQH_1	LQH	1	0.9982	0.98934	0.000201447	0.00861418	0.00020481	0.666667	0.222222	0.666667	0.222222	NA	NA	NA	16
9	LQHP_1	LQHP	1	0.9979	0.991035	0.000164736	0.00694239	0.000163795	0.666667	0.222222	0.666667	0.222222	NA	NA	NA	18
10	LQHPT_1	LQHPT	1	0.9979	0.991035	0.000164736	0.00694239	0.000163795	0.666667	0.222222	0.666667	0.222222	NA	NA	NA	18
11	L_1.5	L	1.5	0.9306	0.876135	0.0424842	0.0661745	0.0361109	0.291667	0.229167	0.0416667	0.00694444	391.681	18.0841	0.000116965	6
12	LQ_1.5	LQ	1.5	0.9897	0.980898	9.16599e-05	0.00591	9.26618e-05	0.125	0.0625	0.0833333	0.0277778	417.553	43.9563	2.81827e-10	10
13	LQH_1.5	LQH	1.5	0.997	0.989008	0.000233332	0.0076226	0.00022878	0.416667	0.25	0.416667	0.25	NA	NA	NA	15
14	LQHP_1.5	LQHP	1.5	0.9971	0.991034	0.000158425	0.0059849	0.000141924	0.416667	0.25	0.166667	0.111111	NA	NA	NA	16
15	LQHPT_1.5	LQHPT	1.5	0.9971	0.991034	0.000158425	0.0059849	0.000141924	0.416667	0.25	0.166667	0.111111	NA	NA	NA	16
16	L_2	L	2	0.9266	0.861553	0.0470795	0.0709829	0.0426403	0.291667	0.229167	0.0416667	0.00694444	393.964	20.3675	3.73441e-05	6
17	LQ_2	LQ	2	0.9866	0.976329	7.85635e-05	0.00679359	4.27292e-05	0.225	0.0691667	0.0833333	0.0277778	396.667	23.0702	9.66823e-06	9
18	LQH_2	LQH	2	0.9958	0.988223	0.00027309	0.00663998	0.000258681	0.416667	0.25	0.166667	0.111111	457.196	83.5998	6.9425e-19	11
19	LQHP_2	LQHP	2	0.9965	0.986745	0.000415099	0.00819655	0.000311534	0.466667	0.204444	0.166667	0.111111	453.903	80.3062	3.60327e-18	11
20	LQHPT_2	LQHPT	2	0.9965	0.986745	0.000415099	0.00819655	0.000311534	0.466667	0.204444	0.166667	0.111111	453.903	80.3062	3.60327e-18	11
21	L_2.5	L	2.5	0.9183	0.838271	0.0522903	0.0839066	0.0466059	0.341667	0.200278	0.0416667	0.00694444	396.964	23.3678	8.33129e-06	6
22	LQ_2.5	LQ	2.5	0.9842	0.970427	0.000114304	0.00797335	6.41938e-07	0.325	0.155833	0.0833333	0.0277778	403.657	30.0603	2.93403e-07	9
23	LQH_2.5	LQH	2.5	0.994	0.985226	0.000364595	0.00760513	0.000315329	0.166667	0.111111	0.166667	0.111111	407.418	33.8217	4.47392e-08	10
24	LQHP_2.5	LQHP	2.5	0.9952	0.979259	0.000827353	0.0118016	0.000635585	0.466667	0.204444	0.166667	0.111111	NA	NA	NA	14
25	LQHPT_2.5	LQHPT	2.5	0.9952	0.979259	0.000827353	0.0118016	0.000635585	0.466667	0.204444	0.166667	0.111111	NA	NA	NA	14
26	L_3	L	3	0.9106	0.819089	0.065853	0.097419	0.0549268	0.341667	0.200278	0.0416667	0.00694444	388.953	15.3567	0.000457418	4
27	LQ_3	LQ	3	0.9803	0.963061	0.00040463	0.00945335	2.5989e-05	0.275	0.1025	0	0	410.508	36.9115	9.54415e-09	9
28	LQH_3	LQH	3	0.9932	0.980784	0.00054627	0.00960713	0.000450271	0.216667	0.0988889	0.166667	0.111111	383.637	10.0401	0.00652811	9
29	LQHP_3	LQHP	3	0.9928	0.968647	0.00191302	0.0197131	0.00154121	0.466667	0.204444	0.166667	0.111111	660.36	286.763	5.30982e-63	12
30	LQHPT_3	LQHPT	3	0.9928	0.968647	0.00191302	0.0197131	0.00154121	0.466667	0.204444	0.166667	0.111111	660.36	286.763	5.30982e-63	12
31	L_3.5	L	3.5	0.9051	0.806479	0.0788795	0.100817	0.066295	0.341667	0.200278	0.0416667	0.00694444	392.845	19.2484	6.53497e-05	4
32	LQ_3.5	LQ	3.5	0.9764	0.952604	0.00124661	0.0120914	0.000161248	0.225	0.0691667	0	0	385.496	11.8999	0.002576	7
33	LQH_3.5	LQH	3.5	0.9922	0.977443	0.000693727	0.0109821	0.00053903	0.466667	0.204444	0.166667	0.111111	390.169	16.5722	0.000249093	9
34	LQHP_3.5	LQHP	3.5	0.9892	0.954541	0.00507989	0.0307977	0.00417476	0.466667	0.204444	0.125	0.0625	490.067	116.471	5.05406e-26	11
35	LQHPT_3.5	LQHPT	3.5	0.9892	0.954541	0.00507989	0.0307977	0.00417476	0.466667	0.204444	0.125	0.0625	490.067	116.471	5.05406e-26	11
36	L_4	L	4	0.8871	0.800035	0.0708224	0.0943183	0.0647041	0.341667	0.200278	0.0416667	0.00694444	394.041	20.4446	3.59324e-05	3
37	LQ_4	LQ	4	0.9733	0.946273	0.00132125	0.0127004	0.000389486	0.425	0.189167	0.0416667	0.00694444	389.57	15.9731	0.000336091	7
38	LQH_4	LQH	4	0.9907	0.974662	0.000697267	0.0120332	0.000550334	0.466667	0.204444	0.166667	0.111111	396.774	23.1774	9.16369e-06	9
39	LQHP_4	LQHP	4	0.9831	0.93587	0.0134628	0.0448575	0.0110241	0.425	0.189167	0.125	0.0625	409.885	36.2884	1.30331e-08	9
40	LQHPT_4	LQHPT	4	0.9831	0.93587	0.0134628	0.0448575	0.0110241	0.425	0.189167	0.125	0.0625	409.885	36.2884	1.30331e-08	9
S5
1	L_0.5	L	0.5	0.9601	0.932137	0.00182762	0.0336	0.00159755	0.625	0.229167	0.375	0.229167	302.31	77.423	8.13321e-18	6
2	LQ_0.5	LQ	0.5	0.994	0.97835	0.00185125	0.016731	0.0022078	0.75	0.25	0.25	0.25	NA	NA	NA	10
3	LQH_0.5	LQH	0.5	0.9989	0.9776	0.00163434	0.0214238	0.00170577	0.625	0.229167	0.5	0.333333	NA	NA	NA	19
4	LQHP_0.5	LQHP	0.5	0.9991	0.977781	0.00168392	0.0213601	0.00173763	0.5625	0.265625	0.5	0.333333	NA	NA	NA	17
5	LQHPT_0.5	LQHPT	0.5	0.9991	0.977781	0.00168392	0.0213601	0.00173763	0.5625	0.265625	0.5	0.333333	NA	NA	NA	17
6	L_1	L	1	0.9617	0.933781	0.00171173	0.033222	0.00160932	0.625	0.229167	0.375	0.229167	247.484	22.5968	6.54047e-06	5
7	LQ_1	LQ	1	0.9902	0.974725	0.00125773	0.0178351	0.00163365	0.5	0.333333	0.25	0.25	NA	NA	NA	8
8	LQH_1	LQH	1	0.9977	0.984144	0.000648371	0.013431	0.000754285	0.8125	0.140625	0.5	0.333333	NA	NA	NA	12
9	LQHP_1	LQHP	1	0.9977	0.985638	0.000489481	0.0123155	0.000572417	0.75	0.25	0.5	0.333333	NA	NA	NA	14
10	LQHPT_1	LQHPT	1	0.9977	0.985638	0.000489481	0.0123155	0.000572417	0.75	0.25	0.5	0.333333	NA	NA	NA	14
11	L_1.5	L	1.5	0.9626	0.934894	0.00122053	0.0311887	0.00167027	0.625	0.229167	0.375	0.229167	230.157	5.27015	0.0378482	4
12	LQ_1.5	LQ	1.5	0.9876	0.968975	0.00137229	0.0211066	0.00184717	0.5	0.333333	0.25	0.25	NA	NA	NA	8
13	LQH_1.5	LQH	1.5	0.996	0.983719	0.000479123	0.0121429	0.00065048	0.8125	0.140625	0.5	0.333333	NA	NA	NA	11
14	LQHP_1.5	LQHP	1.5	0.9965	0.983394	0.0001133	0.0102807	0.000220909	0.8125	0.140625	0.4375	0.182292	NA	NA	NA	11
15	LQHPT_1.5	LQHPT	1.5	0.9965	0.983394	0.0001133	0.0102807	0.000220909	0.8125	0.140625	0.4375	0.182292	NA	NA	NA	11
16	L_2	L	2	0.9629	0.938063	0.00171471	0.0268411	0.00235384	0.625	0.229167	0.375	0.229167	231.988	7.10151	0.0151486	4
17	LQ_2	LQ	2	0.9834	0.962444	0.00118398	0.0226911	0.00213394	0.5	0.333333	0.25	0.25	293.869	68.9822	5.5353e-16	6
18	LQH_2	LQH	2	0.9944	0.97735	0.000199439	0.0142565	0.000515296	0.875	0.0625	0.5	0.333333	NA	NA	NA	9
19	LQHP_2	LQHP	2	0.996	0.970094	0.000646691	0.0206777	0.000148072	0.875	0.0625	0.5	0.166667	NA	NA	NA	9
20	LQHPT_2	LQHPT	2	0.996	0.970094	0.000646691	0.0206777	0.000148072	0.875	0.0625	0.5	0.166667	NA	NA	NA	9
21	L_2.5	L	2.5	0.9626	0.922906	0.00159943	0.0295381	0.00264338	0.6875	0.140625	0.375	0.229167	224.887	0	0.52777	3
22	LQ_2.5	LQ	2.5	0.9818	0.948369	0.00114547	0.025272	0.00218251	0.5625	0.265625	0.5	0.333333	297.212	72.3246	1.04079e-16	6
23	LQH_2.5	LQH	2.5	0.9935	0.975794	0.00010481	0.0149155	0.000434154	0.875	0.0625	0.5	0.333333	NA	NA	NA	9
24	LQHP_2.5	LQHP	2.5	0.9941	0.945194	0.00315693	0.0245116	0.000442467	0.8125	0.140625	0.4375	0.182292	NA	NA	NA	11
25	LQHPT_2.5	LQHPT	2.5	0.9941	0.945194	0.00315693	0.0245116	0.000442467	0.8125	0.140625	0.4375	0.182292	NA	NA	NA	11
26	L_3	L	3	0.9608	0.879109	0.0143514	0.0463705	0.0024252	0.75	0.0833333	0.6875	0.140625	227.88	2.99329	0.118157	3
27	LQ_3	LQ	3	0.9802	0.943244	0.00125503	0.0293714	0.00261692	0.5625	0.265625	0.5	0.333333	244.74	19.8528	2.57907e-05	5
28	LQH_3	LQH	3	0.9922	0.97155	9.03788e-05	0.0173	0.000499209	0.8125	0.140625	0.5	0.333333	NA	NA	NA	8
29	LQHP_3	LQHP	3	0.9883	0.927634	0.00326523	0.0363881	0.0029247	0.8125	0.140625	0.8125	0.140625	NA	NA	NA	10
30	LQHPT_3	LQHPT	3	0.9883	0.927634	0.00326523	0.0363881	0.0029247	0.8125	0.140625	0.8125	0.140625	NA	NA	NA	10
31	L_3.5	L	3.5	0.9499	0.860628	0.0148589	0.0596705	0.00488638	0.75	0.0833333	0.6875	0.140625	226.278	1.39088	0.26328	2
32	LQ_3.5	LQ	3.5	0.9775	0.928119	0.00381663	0.0431649	0.00550814	0.5	0.333333	0.5	0.333333	248.77	23.8833	3.4376e-06	5
33	LQH_3.5	LQH	3.5	0.9909	0.959731	0.000211649	0.0220518	0.000780073	0.75	0.25	0.5	0.333333	NA	NA	NA	7
34	LQHP_3.5	LQHP	3.5	0.9803	0.794256	0.155571	0.0502935	0.0115244	0.5625	0.265625	0.5625	0.265625	NA	NA	NA	7
35	LQHPT_3.5	LQHPT	3.5	0.9803	0.794256	0.155571	0.0502935	0.0115244	0.5625	0.265625	0.5625	0.265625	NA	NA	NA	7
36	L_4	L	4	0.9418	0.810572	0.0319434	0.0822884	0.0137387	0.75	0.0833333	0.6875	0.140625	230.162	5.27485	0.0377595	2
37	LQ_4	LQ	4	0.9711	0.876675	0.00917107	0.0609262	0.0119573	0.5	0.333333	0.5	0.333333	253.64	28.7532	3.01132e-07	5
38	LQH_4	LQH	4	0.9894	0.92975	0.00453195	0.0289976	0.00145657	0.75	0.25	0.5	0.333333	299.534	74.6467	3.25931e-17	6
39	LQHP_4	LQHP	4	0.9602	0.768956	0.145493	0.0542155	0.0122047	0.5625	0.265625	0.3125	0.223958	315.526	90.6396	1.09725e-20	6
40	LQHPT_4	LQHPT	4	0.9602	0.768956	0.145493	0.0542155	0.0122047	0.5625	0.265625	0.3125	0.223958	315.526	90.6396	1.09725e-20	6
S6
1	L_0.5	L	0.5	0.952	0.947225	0.00272233	0.0189904	0.00080915	0.125	0.0625	0.125	0.0625	371.411	35.6509	1.60455e-08	5
2	LQ_0.5	LQ	0.5	0.9959	0.990944	0.000129102	0.00428125	8.43737e-05	0.25	0.0833333	0.25	0.0833333	358.453	22.6934	1.04484e-05	9
3	LQH_0.5	LQH	0.5	0.9987	0.994613	2.52345e-05	0.004155	2.85008e-05	0.75	0.0416667	0.375	0.104167	NA	NA	NA	19
4	LQHP_0.5	LQHP	0.5	0.9991	0.995453	1.72884e-05	0.00354979	1.88437e-05	0.8125	0.0572917	0.4375	0.0989583	NA	NA	NA	32
5	LQHPT_0.5	LQHPT	0.5	0.9991	0.995453	1.72884e-05	0.00354979	1.88437e-05	0.8125	0.0572917	0.4375	0.0989583	NA	NA	NA	32
6	L_1	L	1	0.9524	0.946881	0.00287438	0.0200858	0.00092241	0.3125	0.0572917	0.1875	0.0572917	373.214	37.4536	6.51482e-09	5
7	LQ_1	LQ	1	0.9926	0.988231	0.000203735	0.00469083	0.000123162	0.125	0.0625	0.125	0.0625	351.98	16.2204	0.000265853	8
8	LQH_1	LQH	1	0.9983	0.991663	3.20177e-05	0.00531333	3.04081e-05	0.3125	0.0572917	0.25	0.0416667	NA	NA	NA	22
9	LQHP_1	LQHP	1	0.9984	0.9918	3.07508e-05	0.00551042	2.74781e-05	0.625	0.0625	0.5	0.0416667	NA	NA	NA	31
10	LQHPT_1	LQHPT	1	0.9984	0.9918	3.07508e-05	0.00551042	2.74781e-05	0.625	0.0625	0.5	0.0416667	NA	NA	NA	31
11	L_1.5	L	1.5	0.9525	0.945981	0.0030296	0.0211271	0.00104241	0.3125	0.0572917	0.1875	0.0572917	375.509	39.7493	2.06729e-09	5
12	LQ_1.5	LQ	1.5	0.9898	0.984681	0.00028742	0.00604292	0.000171493	0.125	0.0625	0.125	0.0625	340.7	4.93963	0.0748559	6
13	LQH_1.5	LQH	1.5	0.9954	0.989981	7.07332e-05	0.00512458	5.19924e-05	0.25	0.0416667	0.1875	0.0572917	NA	NA	NA	13
14	LQHP_1.5	LQHP	1.5	0.996	0.989569	4.27159e-05	0.00614917	3.64982e-05	0.375	0.0208333	0.3125	0.0572917	NA	NA	NA	34
15	LQHPT_1.5	LQHPT	1.5	0.996	0.989569	4.27159e-05	0.00614917	3.64982e-05	0.375	0.0208333	0.3125	0.0572917	NA	NA	NA	34
16	L_2	L	2	0.9524	0.9472	0.00287694	0.0197092	0.000978426	0.3125	0.0572917	0.1875	0.0572917	372.63	36.8703	8.72123e-09	4
17	LQ_2	LQ	2	0.9882	0.981719	0.000379012	0.00691667	0.000219889	0.125	0.0625	0.125	0.0625	346.644	10.8842	0.00383154	6
18	LQH_2	LQH	2	0.9942	0.988694	8.88415e-05	0.00495292	6.66849e-05	0.1875	0.0572917	0.1875	0.0572917	393.695	57.9354	2.3245e-13	10
19	LQHP_2	LQHP	2	0.9942	0.988981	6.60021e-05	0.00549875	6.24679e-05	0.3125	0.0572917	0.3125	0.0572917	NA	NA	NA	23
20	LQHPT_2	LQHPT	2	0.9942	0.988981	6.60021e-05	0.00549875	6.24679e-05	0.3125	0.0572917	0.3125	0.0572917	NA	NA	NA	23
21	L_2.5	L	2.5	0.9527	0.947781	0.00274094	0.0186071	0.000947806	0.1875	0.0572917	0.0625	0.015625	374.135	38.3747	4.11055e-09	4
22	LQ_2.5	LQ	2.5	0.9866	0.979825	0.000405603	0.00728292	0.000222767	0.125	0.0625	0.125	0.0625	360.448	24.6885	3.85311e-06	7
23	LQH_2.5	LQH	2.5	0.9927	0.988144	8.94277e-05	0.00450792	6.64371e-05	0.1875	0.0572917	0.1875	0.0572917	400.518	64.7585	7.66884e-15	10
24	LQHP_2.5	LQHP	2.5	0.9935	0.987712	5.90914e-05	0.00544208	7.09043e-05	0.3125	0.0572917	0.3125	0.0572917	NA	NA	NA	23
25	LQHPT_2.5	LQHPT	2.5	0.9935	0.987712	5.90914e-05	0.00544208	7.09043e-05	0.3125	0.0572917	0.3125	0.0572917	NA	NA	NA	23
26	L_3	L	3	0.9529	0.94755	0.00259734	0.0183992	0.000919449	0.1875	0.0572917	0.0625	0.015625	375.777	40.0171	1.8082e-09	4
27	LQ_3	LQ	3	0.9846	0.978044	0.000472142	0.00746208	0.000222611	0.125	0.0625	0.125	0.0625	365.81	30.0502	2.63952e-07	7
28	LQH_3	LQH	3	0.9916	0.9871	8.61215e-05	0.00460125	7.5806e-05	0.1875	0.0572917	0.1875	0.0572917	335.76	0	0.884814	6
29	LQHP_3	LQHP	3	0.9923	0.985494	3.23263e-05	0.00517042	7.59991e-05	0.3125	0.0572917	0.1875	0.0572917	NA	NA	NA	18
30	LQHPT_3	LQHPT	3	0.9923	0.985494	3.23263e-05	0.00517042	7.59991e-05	0.3125	0.0572917	0.1875	0.0572917	NA	NA	NA	18
31	L_3.5	L	3.5	0.953	0.945744	0.00229138	0.0187308	0.000868221	0.1875	0.0572917	0.0625	0.015625	377.569	41.809	7.38137e-10	4
32	LQ_3.5	LQ	3.5	0.9824	0.975275	0.000559689	0.00818708	0.000226866	0.125	0.0625	0.125	0.0625	362.17	26.4097	1.62947e-06	6
33	LQH_3.5	LQH	3.5	0.991	0.986156	6.34869e-05	0.00442875	7.28533e-05	0.1875	0.0572917	0.1875	0.0572917	347.625	11.8647	0.00234668	7
34	LQHP_3.5	LQHP	3.5	0.9911	0.983275	2.66152e-05	0.00473333	7.51021e-05	0.3125	0.0572917	0.1875	0.0572917	NA	NA	NA	16
35	LQHPT_3.5	LQHPT	3.5	0.9911	0.983275	2.66152e-05	0.00473333	7.51021e-05	0.3125	0.0572917	0.1875	0.0572917	NA	NA	NA	16
36	L_4	L	4	0.9533	0.939731	0.0013401	0.0190667	0.000876627	0.1875	0.0572917	0.0625	0.015625	379.536	43.7765	2.75997e-10	4
37	LQ_4	LQ	4	0.9808	0.971662	0.000560868	0.00918375	0.000233612	0.1875	0.0572917	0.1875	0.0572917	365.862	30.1019	2.5722e-07	6
38	LQH_4	LQH	4	0.9905	0.984956	5.31078e-05	0.00446333	7.41159e-05	0.1875	0.0572917	0.1875	0.0572917	342.286	6.52575	0.0338691	6
39	LQHP_4	LQHP	4	0.9897	0.981812	3.52735e-05	0.00428167	6.94451e-05	0.1875	0.0572917	0.0625	0.015625	NA	NA	NA	14
40	LQHPT_4	LQHPT	4	0.9897	0.981812	3.52735e-05	0.00428167	6.94451e-05	0.1875	0.0572917	0.0625	0.015625	NA	NA	NA	14
S7
1	L_0.5	L	0.5	0.8466	0.727754	0.197597	0.175087	0.175571	0.403509	0.277932	0.333333	0.333333	616.47	185.545	2.56137e-41	6
2	LQ_0.5	LQ	0.5	0.9884	0.960254	0.00358185	0.027505	0.00433283	0.350877	0.316713	0.333333	0.333333	518.745	87.8198	4.25743e-20	12
3	LQH_0.5	LQH	0.5	0.8634	0.830511	0.156996	0.116702	0.0780013	0.105263	0.033241	0	0	NA	NA	NA	48
4	LQHP_0.5	LQHP	0.5	0.8636	0.830693	0.157025	0.133333	0.101818	0.0877193	0.023084	0	0	NA	NA	NA	54
5	LQHPT_0.5	LQHPT	0.5	0.8636	0.830693	0.157025	0.133333	0.101818	0.0877193	0.023084	0	0	NA	NA	NA	54
6	L_1	L	1	0.8489	0.692345	0.179767	0.175647	0.174577	0.438597	0.261311	0.403509	0.277932	616.995	186.07	1.96915e-41	6
7	LQ_1	LQ	1	0.9828	0.921401	0.00853842	0.0439286	0.00698237	0.561404	0.261311	0.368421	0.301939	545.493	114.568	6.62076e-26	12
8	LQH_1	LQH	1	0.9952	0.98114	0.000857753	0.0133417	0.00101945	0.385965	0.289012	0.166667	0.0833333	538.058	107.134	2.7241e-24	16
9	LQHP_1	LQHP	1	0.9967	0.986925	0.000259673	0.00712167	0.000290477	0.403509	0.277932	0.333333	0.333333	NA	NA	NA	22
10	LQHPT_1	LQHPT	1	0.9967	0.986925	0.000259673	0.00712167	0.000290477	0.403509	0.277932	0.333333	0.333333	NA	NA	NA	22
11	L_1.5	L	1.5	0.8519	0.693996	0.179026	0.175703	0.17681	0.385965	0.289012	0.385965	0.289012	617.781	186.856	1.32969e-41	6
12	LQ_1.5	LQ	1.5	0.9778	0.891688	0.0171297	0.0549845	0.00855915	0.561404	0.261311	0.368421	0.301939	553.47	122.545	1.22658e-27	11
13	LQH_1.5	LQH	1.5	0.9936	0.973489	0.00163062	0.0184917	0.00195839	0.421053	0.268698	0.333333	0.333333	472.116	41.1911	5.68116e-10	13
14	LQHP_1.5	LQHP	1.5	0.9953	0.977459	0.000768586	0.0122533	0.000859917	0.421053	0.268698	0.333333	0.333333	430.925	0	0.5	10
15	LQHPT_1.5	LQHPT	1.5	0.9953	0.977459	0.000768586	0.0122533	0.000859917	0.421053	0.268698	0.333333	0.333333	430.925	0	0.5	10
16	L_2	L	2	0.8543	0.685365	0.176199	0.181577	0.172854	0.649123	0.316713	0.333333	0.333333	618.819	187.895	7.9099e-42	6
17	LQ_2	LQ	2	0.9735	0.844061	0.0439968	0.0749042	0.010224	0.649123	0.316713	0.368421	0.301939	565.633	134.708	2.80206e-30	11
18	LQH_2	LQH	2	0.9923	0.964593	0.00225782	0.0217617	0.00271227	0.438597	0.261311	0.333333	0.333333	520.166	89.2413	2.09152e-20	14
19	LQHP_2	LQHP	2	0.9941	0.952511	0.00453763	0.0137583	0.00108413	0.421053	0.268698	0.333333	0.333333	483.106	52.1814	2.33307e-12	12
20	LQHPT_2	LQHPT	2	0.9941	0.952511	0.00453763	0.0137583	0.00108413	0.421053	0.268698	0.333333	0.333333	483.106	52.1814	2.33307e-12	12
21	L_2.5	L	2.5	0.8562	0.685465	0.17498	0.182134	0.173963	0.649123	0.316713	0.333333	0.333333	620.112	189.187	4.14535e-42	6
22	LQ_2.5	LQ	2.5	0.9698	0.809671	0.0708942	0.0833656	0.0127823	0.666667	0.333333	0.473684	0.252078	575.094	144.17	2.47146e-32	11
23	LQH_2.5	LQH	2.5	0.9906	0.93453	0.00652444	0.0260533	0.00388754	0.421053	0.268698	0.333333	0.333333	497.142	66.2176	2.08935e-15	11
24	LQHP_2.5	LQHP	2.5	0.9931	0.950444	0.00451711	0.0154067	0.00135946	0.421053	0.268698	0.333333	0.333333	488.86	57.9352	1.31372e-13	11
25	LQHPT_2.5	LQHPT	2.5	0.9931	0.950444	0.00451711	0.0154067	0.00135946	0.421053	0.268698	0.333333	0.333333	488.86	57.9352	1.31372e-13	11
26	L_3	L	3	0.8579	0.684815	0.175104	0.183394	0.176487	0.649123	0.316713	0.333333	0.333333	621.663	190.738	1.90897e-42	6
27	LQ_3	LQ	3	0.967	0.836048	0.0407654	0.0644073	0.0184	0.649123	0.316713	0.333333	0.333333	574.665	143.74	3.0636e-32	10
28	LQH_3	LQH	3	0.9894	0.870298	0.0430342	0.0350223	0.00432917	0.649123	0.316713	0.333333	0.333333	510.449	79.5238	2.69523e-18	11
29	LQHP_3	LQHP	3	0.9921	0.813783	0.142574	0.01771	0.00179633	0.333333	0.333333	0.333333	0.333333	493.49	62.5657	1.2972e-14	10
30	LQHPT_3	LQHPT	3	0.9921	0.813783	0.142574	0.01771	0.00179633	0.333333	0.333333	0.333333	0.333333	493.49	62.5657	1.2972e-14	10
31	L_3.5	L	3.5	0.8602	0.615133	0.193212	0.17922	0.183959	0.333333	0.333333	0.333333	0.333333	623.487	192.562	7.66857e-43	6
32	LQ_3.5	LQ	3.5	0.9639	0.7623	0.117545	0.0637517	0.0232772	0.333333	0.333333	0.333333	0.333333	568.402	137.477	7.01808e-31	8
33	LQH_3.5	LQH	3.5	0.9883	0.7977	0.132048	0.0334683	0.00641529	0.333333	0.333333	0.333333	0.333333	514.942	84.0169	2.85056e-19	10
34	LQHP_3.5	LQHP	3.5	0.991	0.81175	0.141095	0.019545	0.00218786	0.333333	0.333333	0.333333	0.333333	498.724	67.799	9.47565e-16	9
35	LQHPT_3.5	LQHPT	3.5	0.991	0.81175	0.141095	0.019545	0.00218786	0.333333	0.333333	0.333333	0.333333	498.724	67.799	9.47565e-16	9
36	L_4	L	4	0.8619	0.614233	0.192167	0.18003	0.185625	0.333333	0.333333	0.333333	0.333333	621.665	190.74	1.90702e-42	5
37	LQ_4	LQ	4	0.9613	0.7584	0.116852	0.0672033	0.025866	0.333333	0.333333	0.333333	0.333333	568.917	137.992	5.42559e-31	7
38	LQH_4	LQH	4	0.987	0.79275	0.129105	0.037685	0.00813364	0.333333	0.333333	0.333333	0.333333	513.895	82.9697	4.81199e-19	8
39	LQHP_4	LQHP	4	0.9898	0.810067	0.139903	0.0211133	0.00255306	0.333333	0.333333	0.333333	0.333333	504.43	73.5053	5.46382e-17	8
40	LQHPT_4	LQHPT	4	0.9898	0.810067	0.139903	0.0211133	0.00255306	0.333333	0.333333	0.333333	0.333333	504.43	73.5053	5.46382e-17	8
S8
1	L_0.5	L	0.5	0.994	0.993487	7.33247e-05	0.00275833	8.21708e-05	0.25	0.0833333	0.125	0.0625	233.162	2.55411	0.170336	5
2	LQ_0.5	LQ	0.5	0.9965	0.983137	0.00186231	0.0148052	0.00194335	0.375	0.229167	0.25	0.25	NA	NA	NA	9
3	LQH_0.5	LQH	0.5	0.9979	0.986934	0.000821869	0.0115964	0.000908865	0.375	0.229167	0.375	0.229167	NA	NA	NA	11
4	LQHP_0.5	LQHP	0.5	0.998	0.986519	0.000924488	0.0122719	0.000997774	0.375	0.229167	0.375	0.229167	NA	NA	NA	12
5	LQHPT_0.5	LQHPT	0.5	0.998	0.986519	0.000924488	0.0122719	0.000997774	0.375	0.229167	0.375	0.229167	NA	NA	NA	12
6	L_1	L	1	0.994	0.993806	7.11724e-05	0.00267708	7.74012e-05	0.3125	0.140625	0.125	0.0625	234.882	4.27442	0.0720683	5
7	LQ_1	LQ	1	0.9952	0.980431	0.00268169	0.0172938	0.00273332	0.375	0.229167	0.25	0.25	273.965	43.3568	2.3503e-10	7
8	LQH_1	LQH	1	0.9979	0.988431	0.00102122	0.0102208	0.00109009	0.375	0.229167	0.25	0.25	345.894	115.286	5.64771e-26	8
9	LQHP_1	LQHP	1	0.9981	0.988006	0.00108486	0.0105203	0.00115555	0.375	0.229167	0.25	0.25	NA	NA	NA	13
10	LQHPT_1	LQHPT	1	0.9981	0.988006	0.00108486	0.0105203	0.00115555	0.375	0.229167	0.25	0.25	NA	NA	NA	13
11	L_1.5	L	1.5	0.9939	0.99315	0.000104774	0.00318333	0.000109443	0.3125	0.140625	0.125	0.0625	238.071	7.46302	0.0146335	5
12	LQ_1.5	LQ	1.5	0.995	0.980275	0.00283205	0.0174677	0.00287293	0.375	0.229167	0.25	0.25	277.145	46.537	4.79239e-11	7
13	LQH_1.5	LQH	1.5	0.9977	0.987313	0.00128265	0.0112229	0.0013603	0.375	0.229167	0.25	0.25	348.637	118.028	1.43339e-26	8
14	LQHP_1.5	LQHP	1.5	0.9978	0.986975	0.00131932	0.0114469	0.00140588	0.375	0.229167	0.25	0.25	NA	NA	NA	14
15	LQHPT_1.5	LQHPT	1.5	0.9978	0.986975	0.00131932	0.0114469	0.00140588	0.375	0.229167	0.25	0.25	NA	NA	NA	14
16	L_2	L	2	0.9938	0.992775	0.00012368	0.0034875	0.000131357	0.3125	0.140625	0.1875	0.140625	242.432	11.8239	0.00165347	5
17	LQ_2	LQ	2	0.9949	0.979738	0.00296191	0.017751	0.00304317	0.375	0.229167	0.25	0.25	281.173	50.5653	6.39444e-12	7
18	LQH_2	LQH	2	0.9974	0.985738	0.00165747	0.0127312	0.00175052	0.375	0.229167	0.25	0.25	351.571	120.963	3.30506e-27	8
19	LQHP_2	LQHP	2	0.9973	0.985425	0.00167857	0.0128604	0.00178622	0.375	0.229167	0.25	0.25	NA	NA	NA	13
20	LQHPT_2	LQHPT	2	0.9973	0.985425	0.00167857	0.0128604	0.00178622	0.375	0.229167	0.25	0.25	NA	NA	NA	13
21	L_2.5	L	2.5	0.9935	0.991975	0.000150542	0.00390625	0.000164795	0.1875	0.140625	0.1875	0.140625	238.121	7.51295	0.0142727	4
22	LQ_2.5	LQ	2.5	0.9946	0.978575	0.0033198	0.018626	0.00339321	0.375	0.229167	0.25	0.25	230.608	0	0.610834	4
23	LQH_2.5	LQH	2.5	0.9971	0.984156	0.00206753	0.0141917	0.00217516	0.375	0.229167	0.25	0.25	234.822	4.21417	0.0742724	6
24	LQHP_2.5	LQHP	2.5	0.9971	0.983213	0.00225644	0.0148958	0.00239637	0.375	0.229167	0.25	0.25	NA	NA	NA	9
25	LQHPT_2.5	LQHPT	2.5	0.9971	0.983213	0.00225644	0.0148958	0.00239637	0.375	0.229167	0.25	0.25	NA	NA	NA	9
26	L_3	L	3	0.9932	0.9905	0.000234324	0.00489583	0.000258867	0.1875	0.140625	0.1875	0.140625	242.169	11.5613	0.00188545	4
27	LQ_3	LQ	3	0.9946	0.976269	0.00406324	0.0203854	0.00414621	0.375	0.229167	0.25	0.25	242.422	11.8143	0.00166145	5
28	LQH_3	LQH	3	0.9969	0.982525	0.00252858	0.0156521	0.00264587	0.375	0.229167	0.25	0.25	268.092	37.484	4.42968e-09	7
29	LQHP_3	LQHP	3	0.9969	0.980044	0.00314886	0.0176729	0.00337318	0.375	0.229167	0.25	0.25	NA	NA	NA	9
30	LQHPT_3	LQHPT	3	0.9969	0.980044	0.00314886	0.0176729	0.00337318	0.375	0.229167	0.25	0.25	NA	NA	NA	9
31	L_3.5	L	3.5	0.9927	0.987503	0.000467156	0.00693646	0.000519636	0.1875	0.140625	0.1875	0.140625	247.304	16.6959	0.000144693	4
32	LQ_3.5	LQ	3.5	0.9944	0.97375	0.0045488	0.0215115	0.00473767	0.375	0.229167	0.25	0.25	236.631	6.02294	0.0300648	4
33	LQH_3.5	LQH	3.5	0.9967	0.980831	0.00304061	0.0171417	0.00317344	0.375	0.229167	0.25	0.25	241.407	10.7995	0.00275961	6
34	LQHP_3.5	LQHP	3.5	0.9965	0.976219	0.00453323	0.0211187	0.00481682	0.375	0.229167	0.25	0.25	NA	NA	NA	9
35	LQHPT_3.5	LQHPT	3.5	0.9965	0.976219	0.00453323	0.0211187	0.00481682	0.375	0.229167	0.25	0.25	NA	NA	NA	9
36	L_4	L	4	0.9912	0.983762	0.00105964	0.0100417	0.00108902	0.1875	0.140625	0.1875	0.140625	254.156	23.5478	4.70531e-06	4
37	LQ_4	LQ	4	0.994	0.973175	0.00464456	0.021375	0.00493442	0.25	0.25	0.25	0.25	240.241	9.63336	0.00494385	4
38	LQH_4	LQH	4	0.9965	0.978812	0.00380239	0.0190354	0.00391335	0.375	0.229167	0.25	0.25	244.967	14.359	0.000465493	6
39	LQHP_4	LQHP	4	0.996	0.972206	0.00632068	0.0239604	0.0062003	0.375	0.229167	0.25	0.25	NA	NA	NA	9
40	LQHPT_4	LQHPT	4	0.996	0.972206	0.00632068	0.0239604	0.0062003	0.375	0.229167	0.25	0.25	NA	NA	NA	9
S10
1	L_0.5	L	0.5	0.916	0.915928	0.0023694	0.014847	0.0014392	0.110294	0.00647719	0.0192308	0.00147929	3217.86	253.546	7.87011e-56	6
2	LQ_0.5	LQ	0.5	0.9706	0.965635	0.000637108	0.010616	0.000349474	0.118811	0.0110991	0.0438771	0.00182898	2964.32	0	0.897114	10
3	LQH_0.5	LQH	0.5	0.9805	0.972309	0.0007716	0.0116245	0.000634224	0.165558	0.0140658	0.0258621	0.00267539	3380.06	415.743	4.73584e-91	82
4	LQHP_0.5	LQHP	0.5	0.9816	0.972855	0.000755814	0.0120666	0.000652477	0.181805	0.0219115	0.0236516	0.0010587	3514.62	550.303	2.85851e-120	89
5	LQHPT_0.5	LQHPT	0.5	0.9816	0.972855	0.000755814	0.0120666	0.000652477	0.181805	0.0219115	0.0236516	0.0010587	3514.62	550.303	2.85851e-120	89
6	L_1	L	1	0.9167	0.916579	0.00232398	0.0148174	0.00143001	0.110294	0.00647719	0.0192308	0.00147929	3216.43	252.113	1.61178e-55	5
7	LQ_1	LQ	1	0.9688	0.963766	0.00083567	0.0113821	0.00053667	0.144117	0.00891615	0.040672	0.00366959	2988.55	24.2312	4.91037e-06	10
8	LQH_1	LQH	1	0.9797	0.97367	0.000694441	0.0103827	0.000547295	0.170973	0.0198017	0.0172414	0.00118906	3006.95	42.6275	4.97045e-10	46
9	LQHP_1	LQHP	1	0.9805	0.974113	0.000668977	0.0106722	0.000524786	0.173184	0.0192539	0.0172414	0.00118906	3022.82	58.5001	1.77711e-13	50
10	LQHPT_1	LQHPT	1	0.9805	0.974113	0.000668977	0.0106722	0.000524786	0.173184	0.0192539	0.0172414	0.00118906	3022.82	58.5001	1.77711e-13	50
11	L_1.5	L	1.5	0.9166	0.916764	0.00231948	0.0148635	0.00143803	0.110294	0.00647719	0.0192308	0.00147929	3216.42	252.103	1.61961e-55	5
12	LQ_1.5	LQ	1.5	0.9657	0.962015	0.00100131	0.0121927	0.000624299	0.134501	0.0100227	0.0342617	0.00233767	3017.09	52.7758	3.10973e-12	10
13	LQH_1.5	LQH	1.5	0.9787	0.973244	0.000741585	0.0107034	0.000534474	0.138701	0.0145684	0.0172414	0.00118906	2991.95	27.6305	8.97344e-07	43
14	LQHP_1.5	LQHP	1.5	0.9795	0.973597	0.000665306	0.0106977	0.000485055	0.129086	0.0165223	0.0172414	0.00118906	2997.78	33.4651	4.85275e-08	45
15	LQHPT_1.5	LQHPT	1.5	0.9795	0.973597	0.000665306	0.0106977	0.000485055	0.129086	0.0165223	0.0172414	0.00118906	2997.78	33.4651	4.85275e-08	45
16	L_2	L	2	0.9165	0.91674	0.00232508	0.0148526	0.0014425	0.110294	0.00647719	0.0192308	0.00147929	3214.28	249.963	4.722e-55	4
17	LQ_2	LQ	2	0.9631	0.960417	0.00112185	0.0125752	0.000676303	0.12367	0.0120117	0.0342617	0.00233767	3039.67	75.3492	3.89921e-17	10
18	LQH_2	LQH	2	0.9778	0.972725	0.000709386	0.0102656	0.000474276	0.135496	0.0197398	0.0172414	0.00118906	2970.94	6.6171	0.0328067	36
19	LQHP_2	LQHP	2	0.9789	0.972658	0.000710344	0.0106738	0.000497878	0.122676	0.0136336	0.0172414	0.00118906	3005.32	41.0028	1.11995e-09	44
20	LQHPT_2	LQHPT	2	0.9789	0.972658	0.000710344	0.0106738	0.000497878	0.122676	0.0136336	0.0172414	0.00118906	3005.32	41.0028	1.11995e-09	44
21	L_2.5	L	2.5	0.9165	0.916717	0.00233375	0.014866	0.00144486	0.110294	0.00647719	0.0192308	0.00147929	3214.4	250.079	4.45568e-55	4
22	LQ_2.5	LQ	2.5	0.9608	0.958731	0.00121099	0.0127774	0.000709884	0.12367	0.0120117	0.0342617	0.00233767	3057.45	93.133	5.36136e-21	10
23	LQH_2.5	LQH	2.5	0.9767	0.971723	0.000744255	0.0105711	0.000490573	0.129086	0.0165223	0.0172414	0.00118906	2977.54	13.2248	0.00120538	33
24	LQHP_2.5	LQHP	2.5	0.9776	0.971602	0.000724725	0.0106626	0.000504556	0.135496	0.0197398	0.0172414	0.00118906	2990.88	26.5611	1.5317e-06	36
25	LQHPT_2.5	LQHPT	2.5	0.9776	0.971602	0.000724725	0.0106626	0.000504556	0.135496	0.0197398	0.0172414	0.00118906	2990.88	26.5611	1.5317e-06	36
26	L_3	L	3	0.9165	0.916673	0.00233975	0.0148817	0.00145082	0.110294	0.00647719	0.0192308	0.00147929	3214.54	250.223	4.14525e-55	4
27	LQ_3	LQ	3	0.9587	0.957198	0.00127068	0.0129097	0.000737203	0.12367	0.0120117	0.0342617	0.00233767	3073.06	108.745	2.18364e-24	10
28	LQH_3	LQH	3	0.976	0.970492	0.000802607	0.0109113	0.000521158	0.129086	0.0165223	0.0172414	0.00118906	2986.18	21.8625	1.605e-05	32
29	LQHP_3	LQHP	3	0.9768	0.970421	0.000766365	0.0108798	0.000521445	0.144117	0.020093	0.0172414	0.00118906	2994.29	29.9701	2.7856e-07	33
30	LQHPT_3	LQHPT	3	0.9768	0.970421	0.000766365	0.0108798	0.000521445	0.144117	0.020093	0.0172414	0.00118906	2994.29	29.9701	2.7856e-07	33
31	L_3.5	L	3.5	0.9165	0.916657	0.00234456	0.0148849	0.00145526	0.110294	0.00647719	0.0192308	0.00147929	3214.72	250.397	3.80093e-55	4
32	LQ_3.5	LQ	3.5	0.9569	0.956137	0.00126472	0.012824	0.00074163	0.12367	0.0120117	0.0342617	0.00233767	3085.79	121.468	3.76977e-27	10
33	LQH_3.5	LQH	3.5	0.9752	0.969288	0.000848177	0.0112207	0.000541365	0.129086	0.0165223	0.0172414	0.00118906	2980.74	16.4262	0.000243193	27
34	LQHP_3.5	LQHP	3.5	0.9759	0.969026	0.000797101	0.0111627	0.000549338	0.153732	0.0177537	0.0172414	0.00118906	2988	23.6827	6.45978e-06	28
35	LQHPT_3.5	LQHPT	3.5	0.9759	0.969026	0.000797101	0.0111627	0.000549338	0.153732	0.0177537	0.0172414	0.00118906	2988	23.6827	6.45978e-06	28
36	L_4	L	4	0.9165	0.91663	0.00235183	0.0148897	0.00146389	0.110294	0.00647719	0.0192308	0.00147929	3214.92	250.599	3.43575e-55	4
37	LQ_4	LQ	4	0.9554	0.95526	0.00121961	0.0126672	0.000736015	0.131735	0.0103059	0.0342617	0.00233767	3091.26	126.941	2.44333e-28	8
38	LQH_4	LQH	4	0.9745	0.96807	0.000872242	0.0114703	0.00055693	0.129086	0.0165223	0.0172414	0.00118906	2969.46	5.14418	0.0685176	20
39	LQHP_4	LQHP	4	0.975	0.967966	0.000784985	0.0111729	0.000546469	0.153732	0.0177537	0.0172414	0.00118906	2984.49	20.1713	3.73859e-05	23
40	LQHPT_4	LQHPT	4	0.975	0.967966	0.000784985	0.0111729	0.000546469	0.153732	0.0177537	0.0172414	0.00118906	2984.49	20.1713	3.73859e-05	23
